# Supplementary material for: Total synthesis of 5-epi-Torrubiellutin C and its biological evaluation
Source: Royal Society of Chemistry journal article supplement (doi:10.1039/c3ra42127a), 2013-01-01
Supplement: c3ra42127a.pdf [file c3ra42127a.pdf]

## Supporting Information

### Total synthesis of 5-*epi*-torrubiellutin C and its biological evaluation

Bodugam Mahipal,<sup>[a]</sup> Ashita Singh,<sup>[b]</sup> Ramesh Ummanni,\*<sup>[b]</sup> Srivari Chandrasekhar\*<sup>[a]</sup>

<sup>a</sup>*Division of Natural Product Chemistry, <sup>b</sup>Center for Chemical Biology, Indian Institute of Chemical Technology, Uppal Road, Tarnaka, Hyderabad, 500007, India.*

*E-mail: [srivaric@iict.res.in](mailto:srivaric@iict.res.in) Fax: (+)91 40 27160512.*

#### Table of contents

|                                                          |       |       |
|----------------------------------------------------------|-------|-------|
| Copies of <sup>1</sup> H and <sup>13</sup> C-NMR Spectra | ----- | 02-39 |
|----------------------------------------------------------|-------|-------|

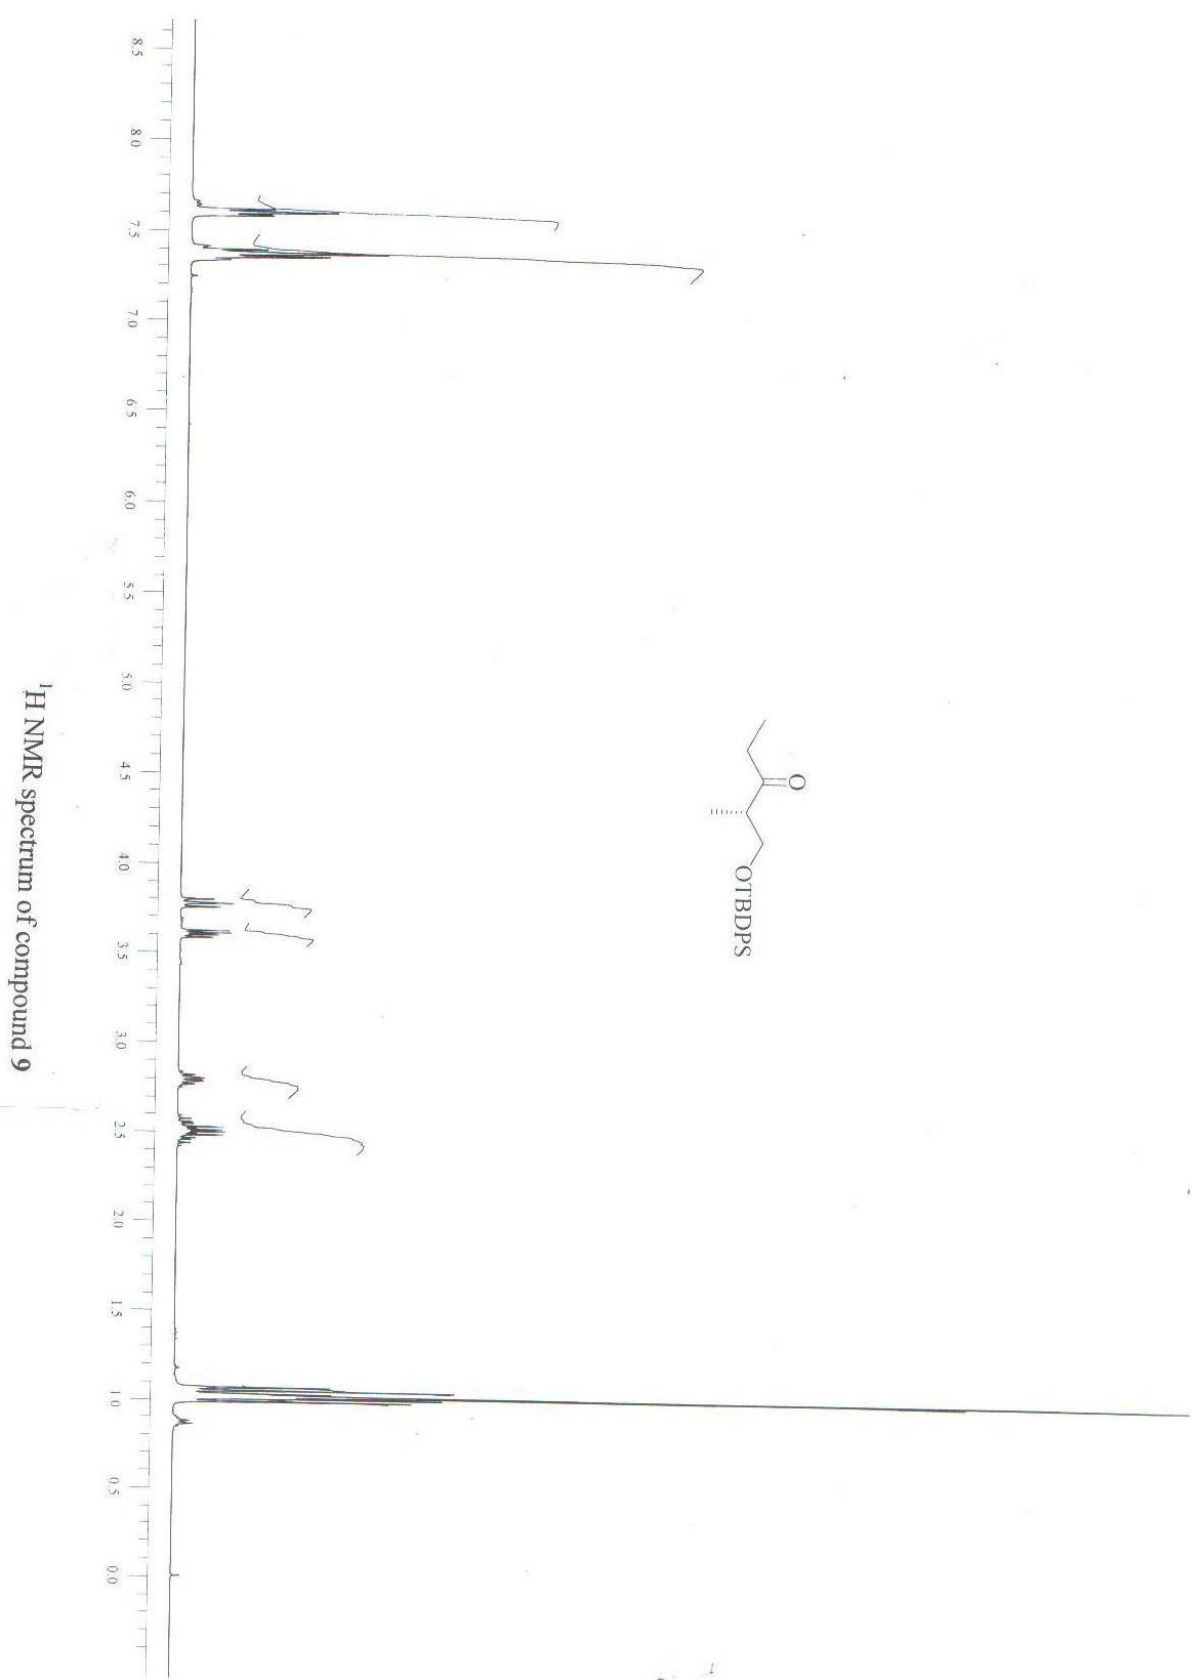

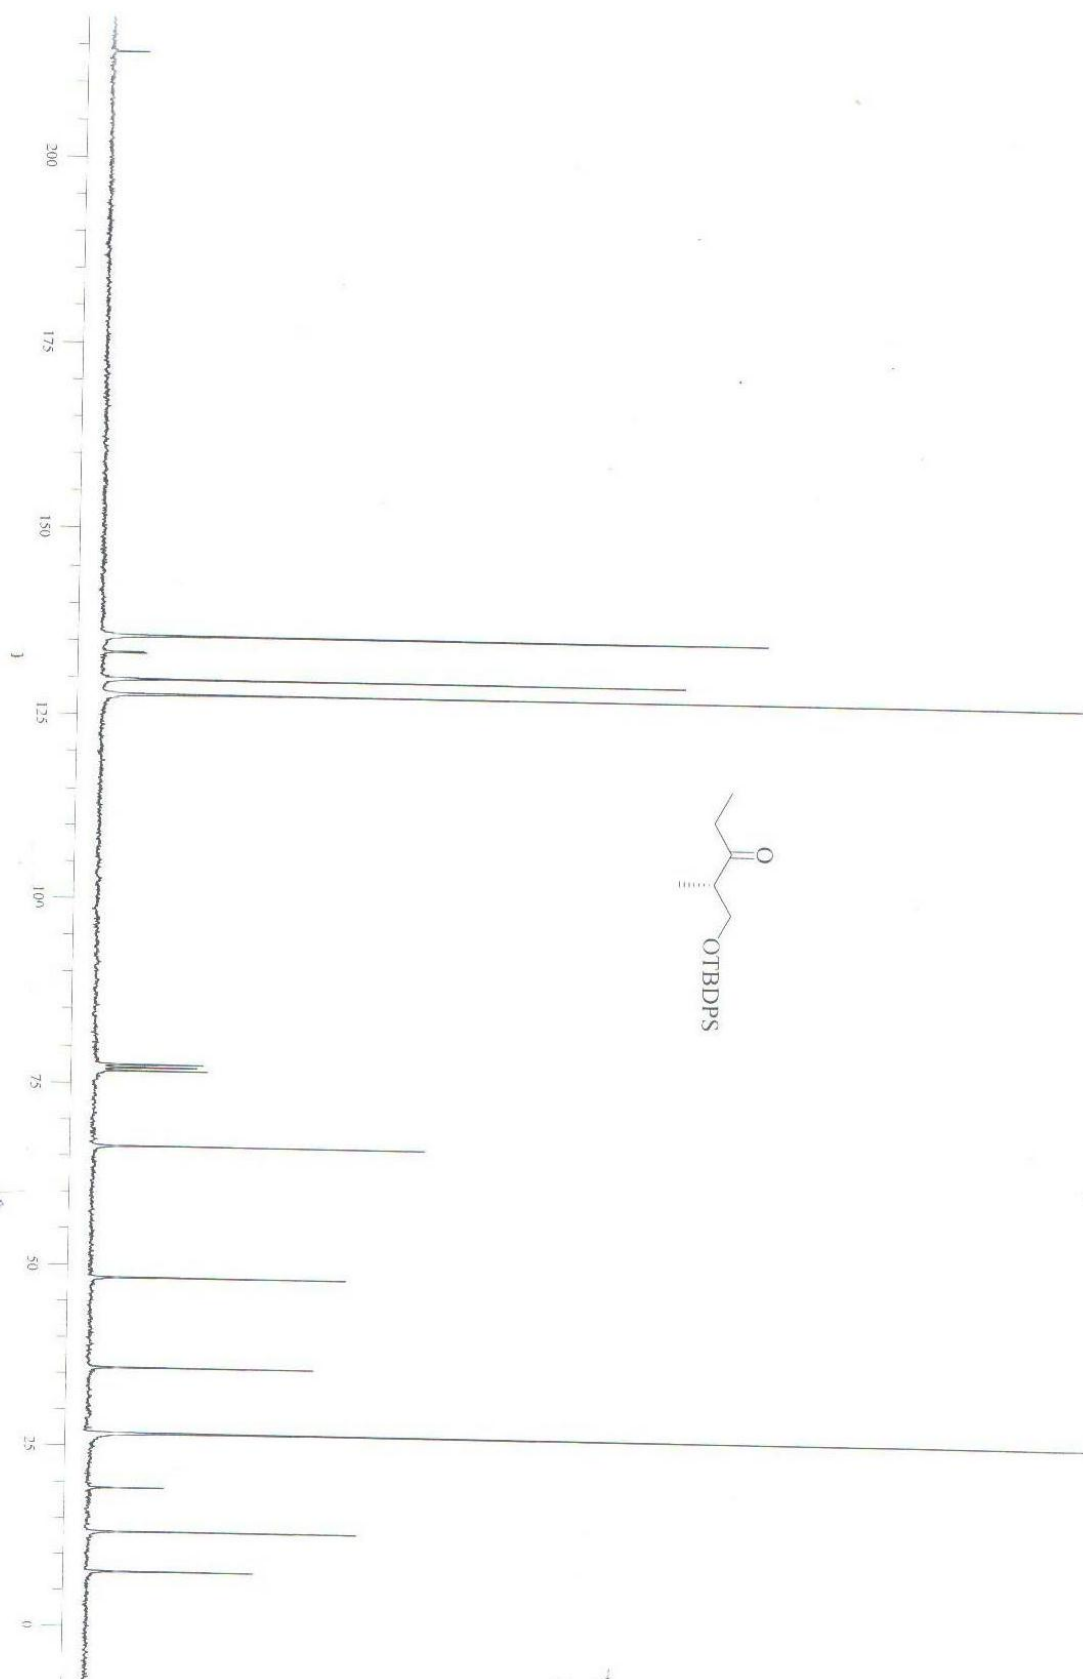

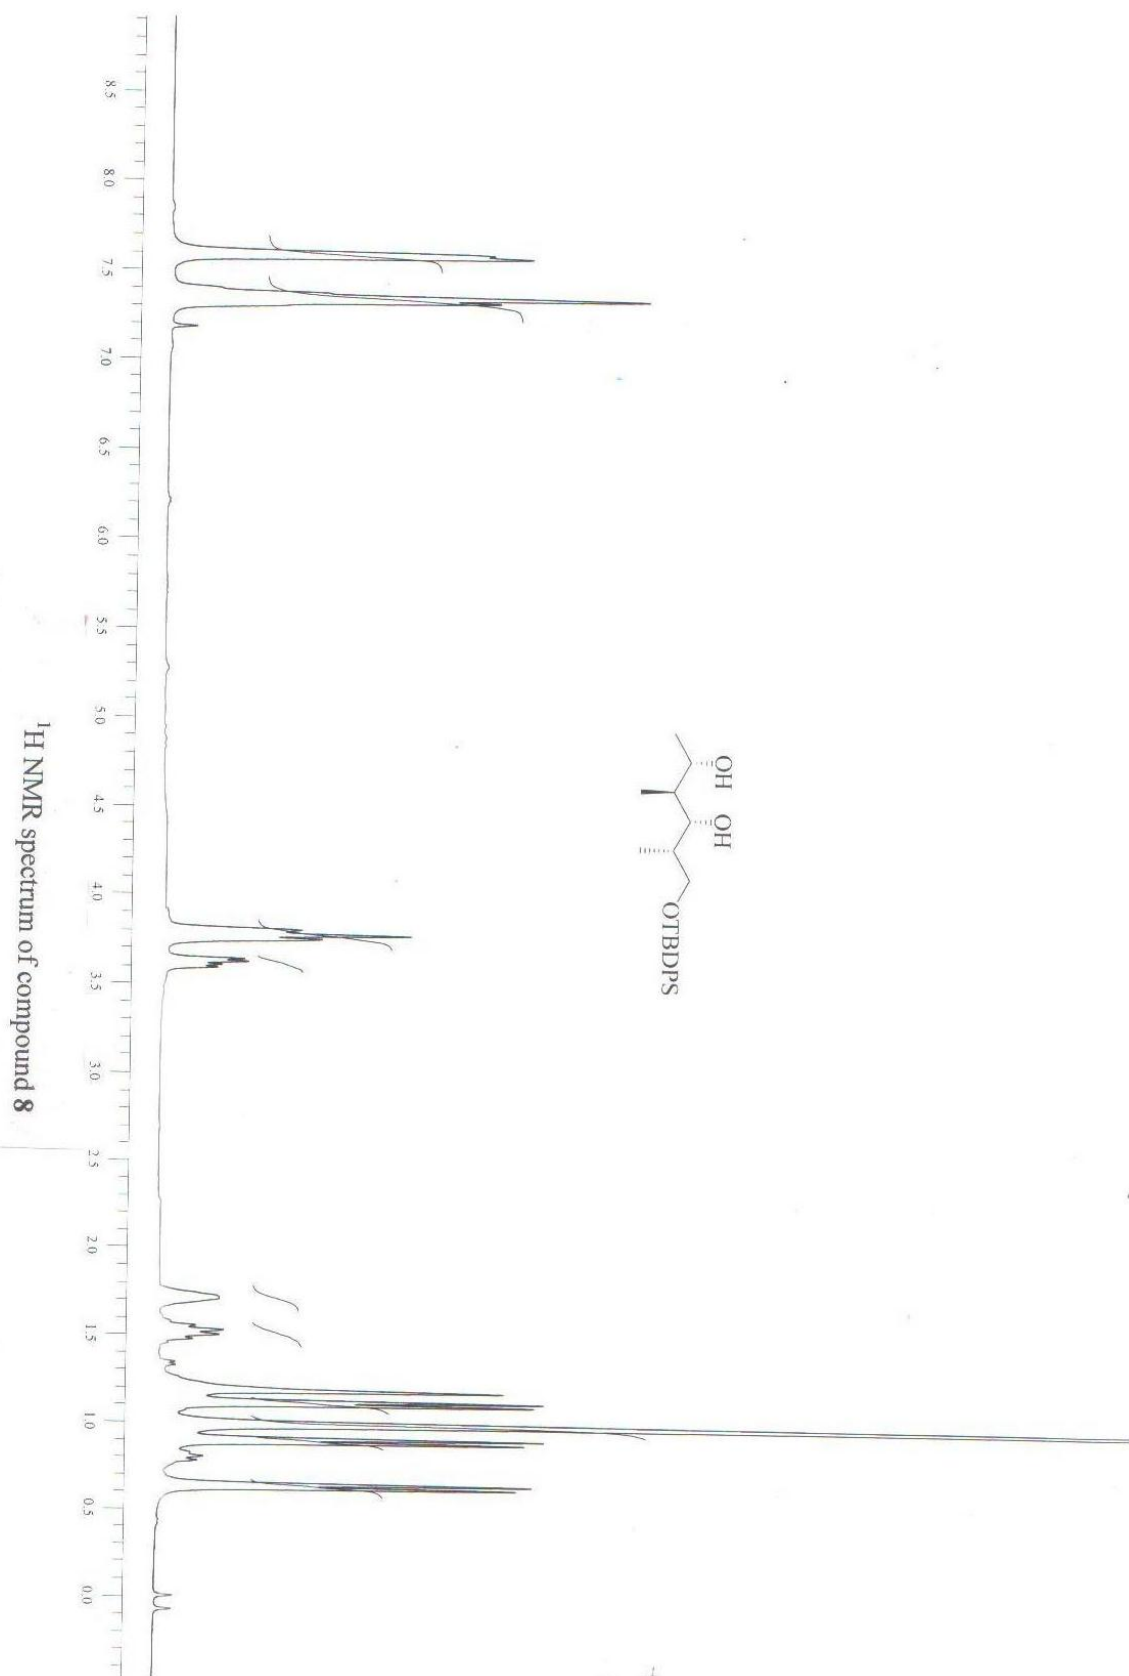

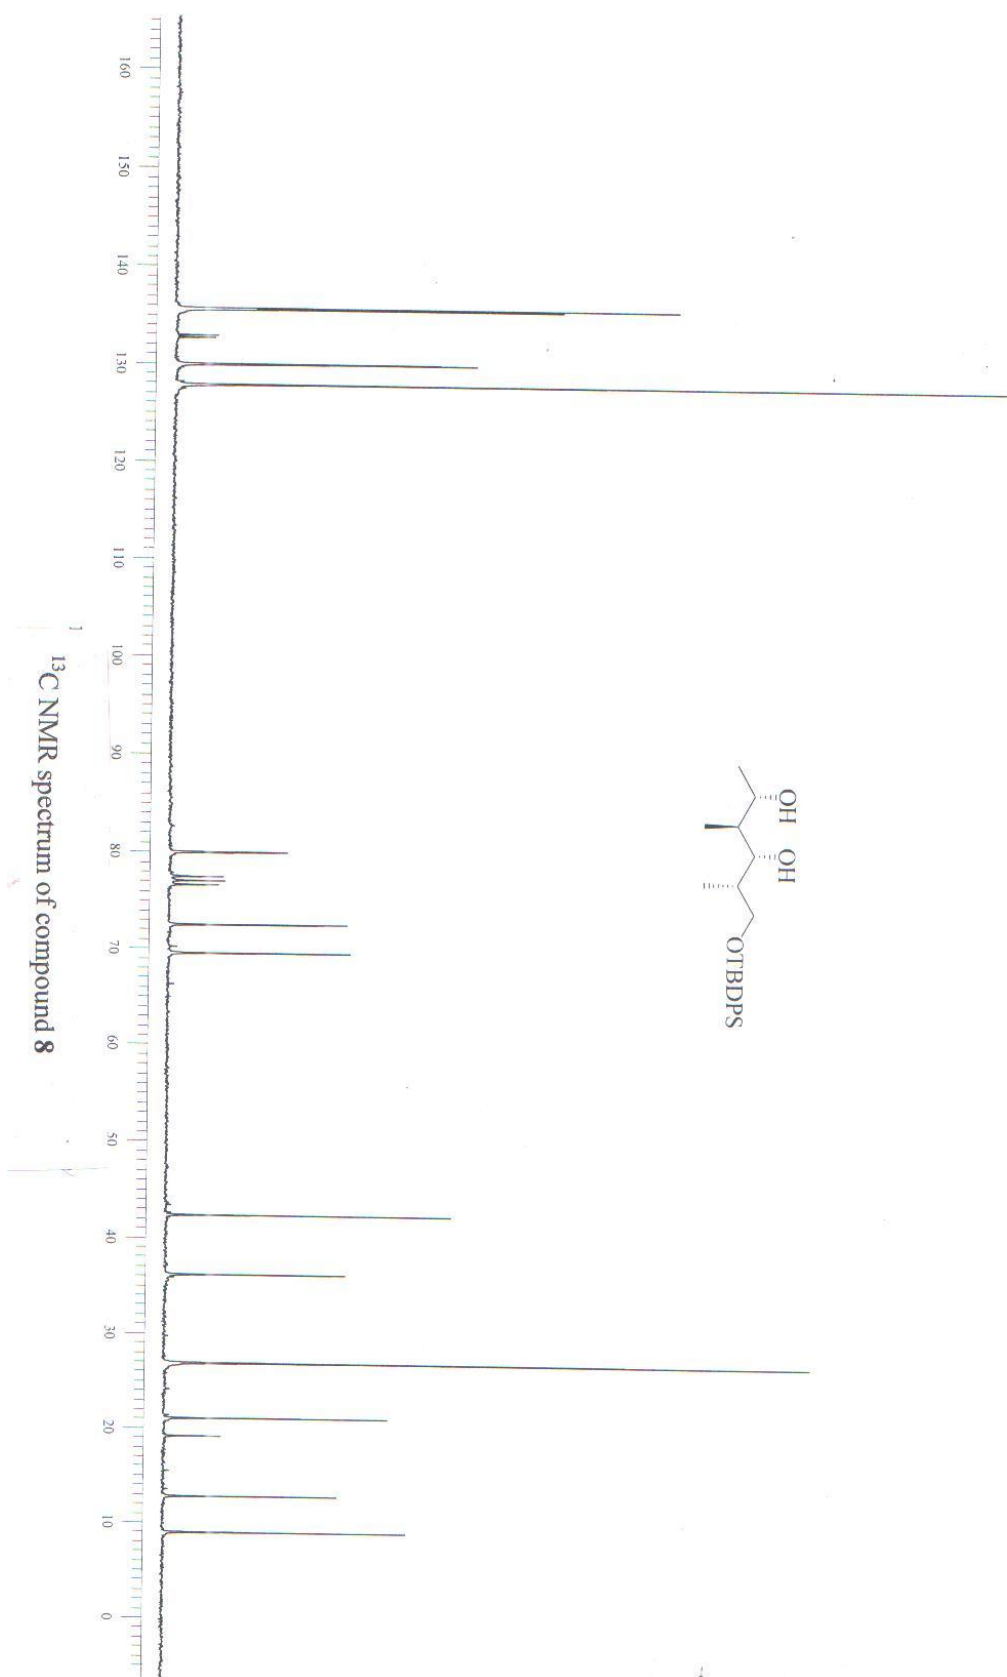

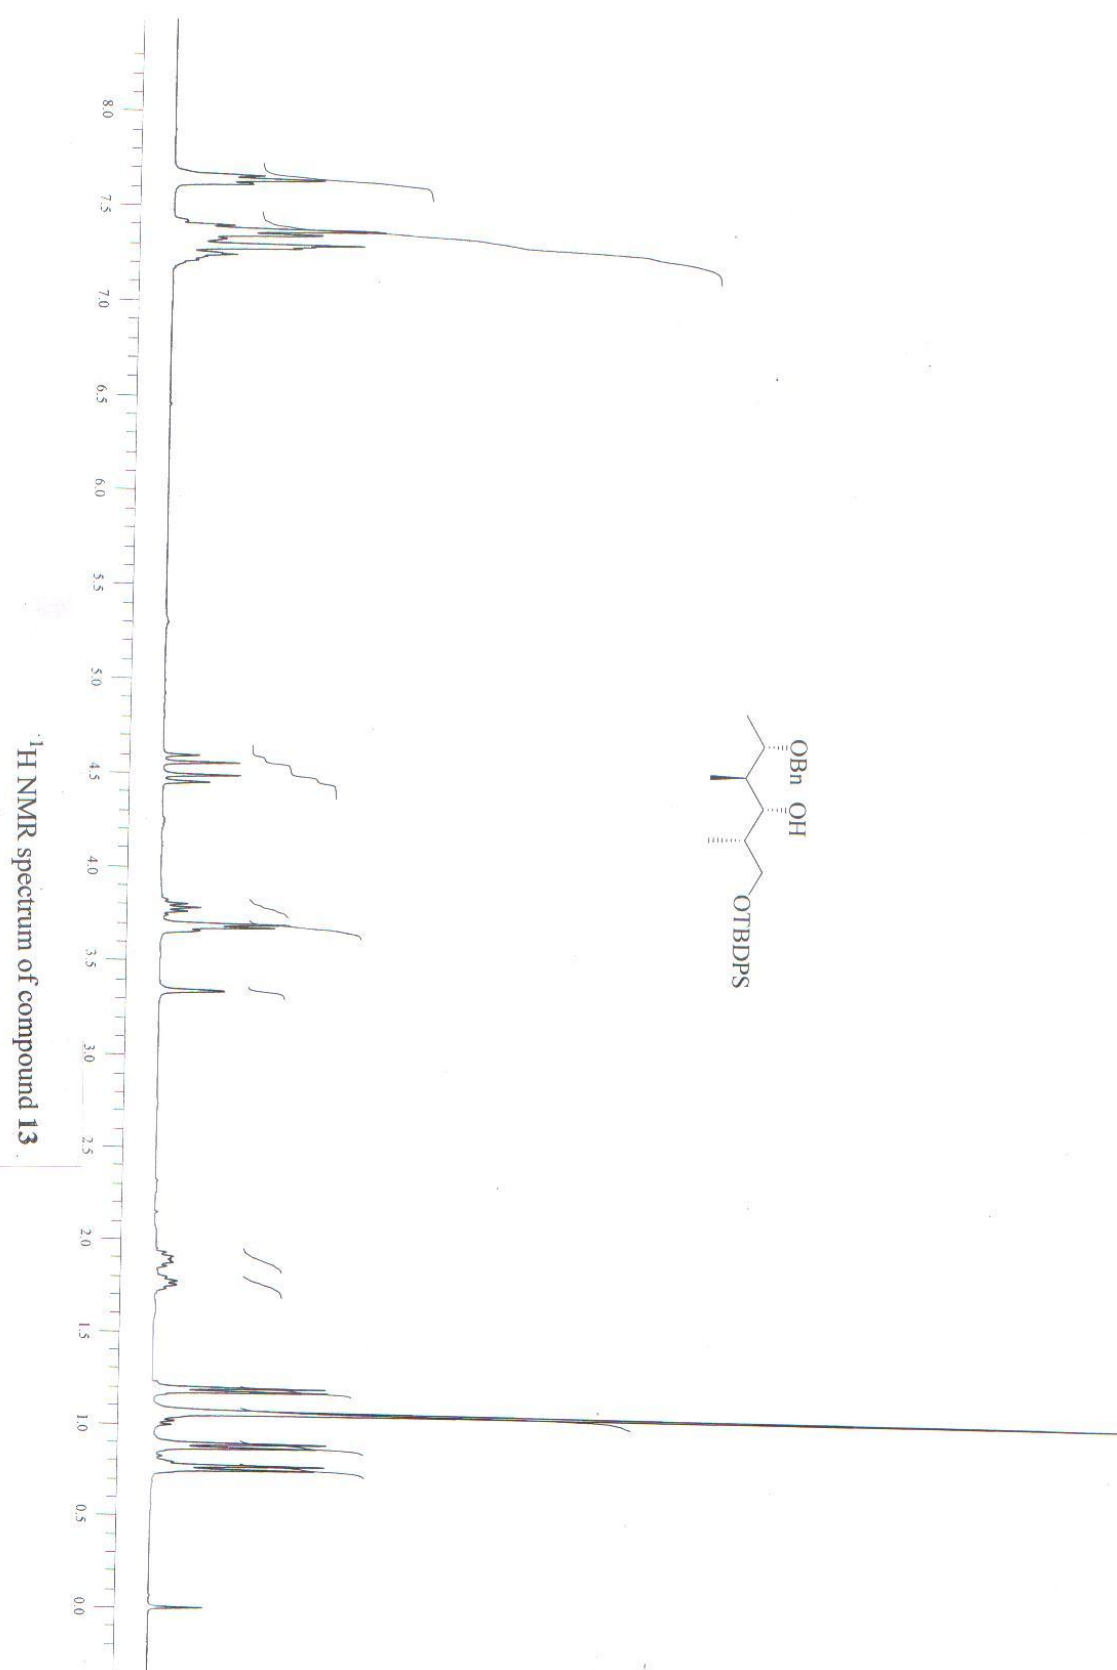

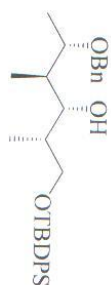

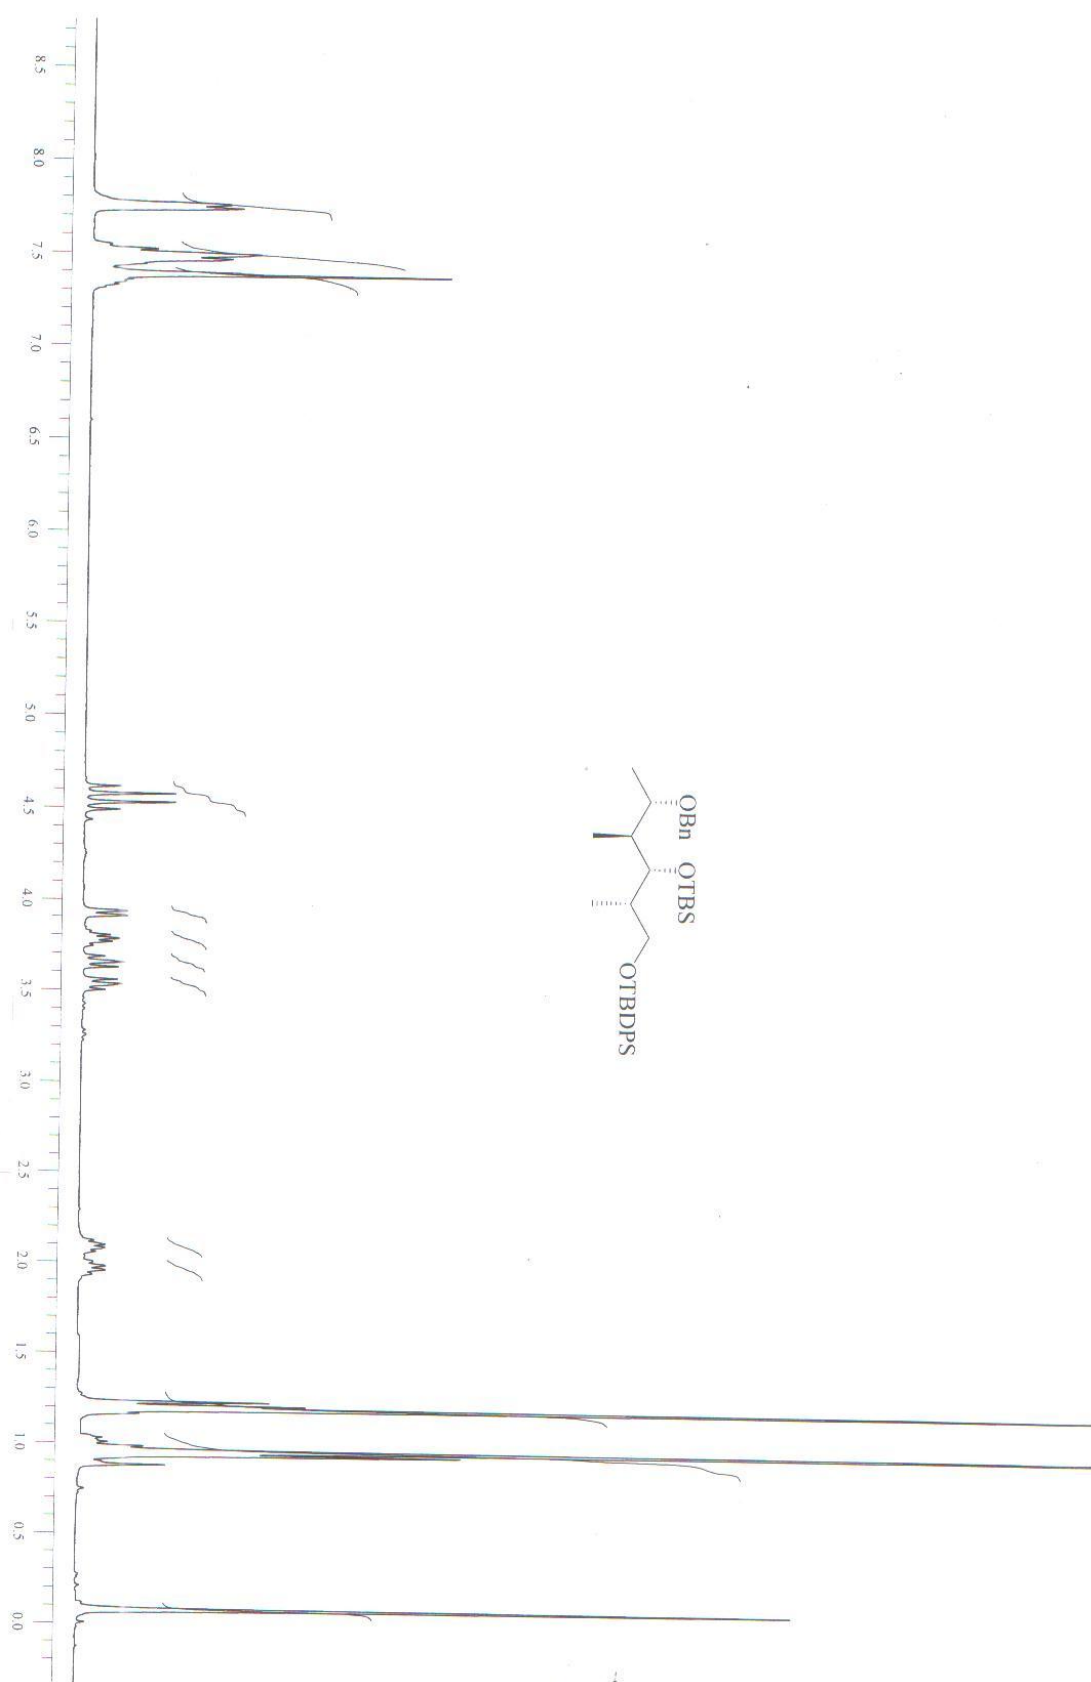



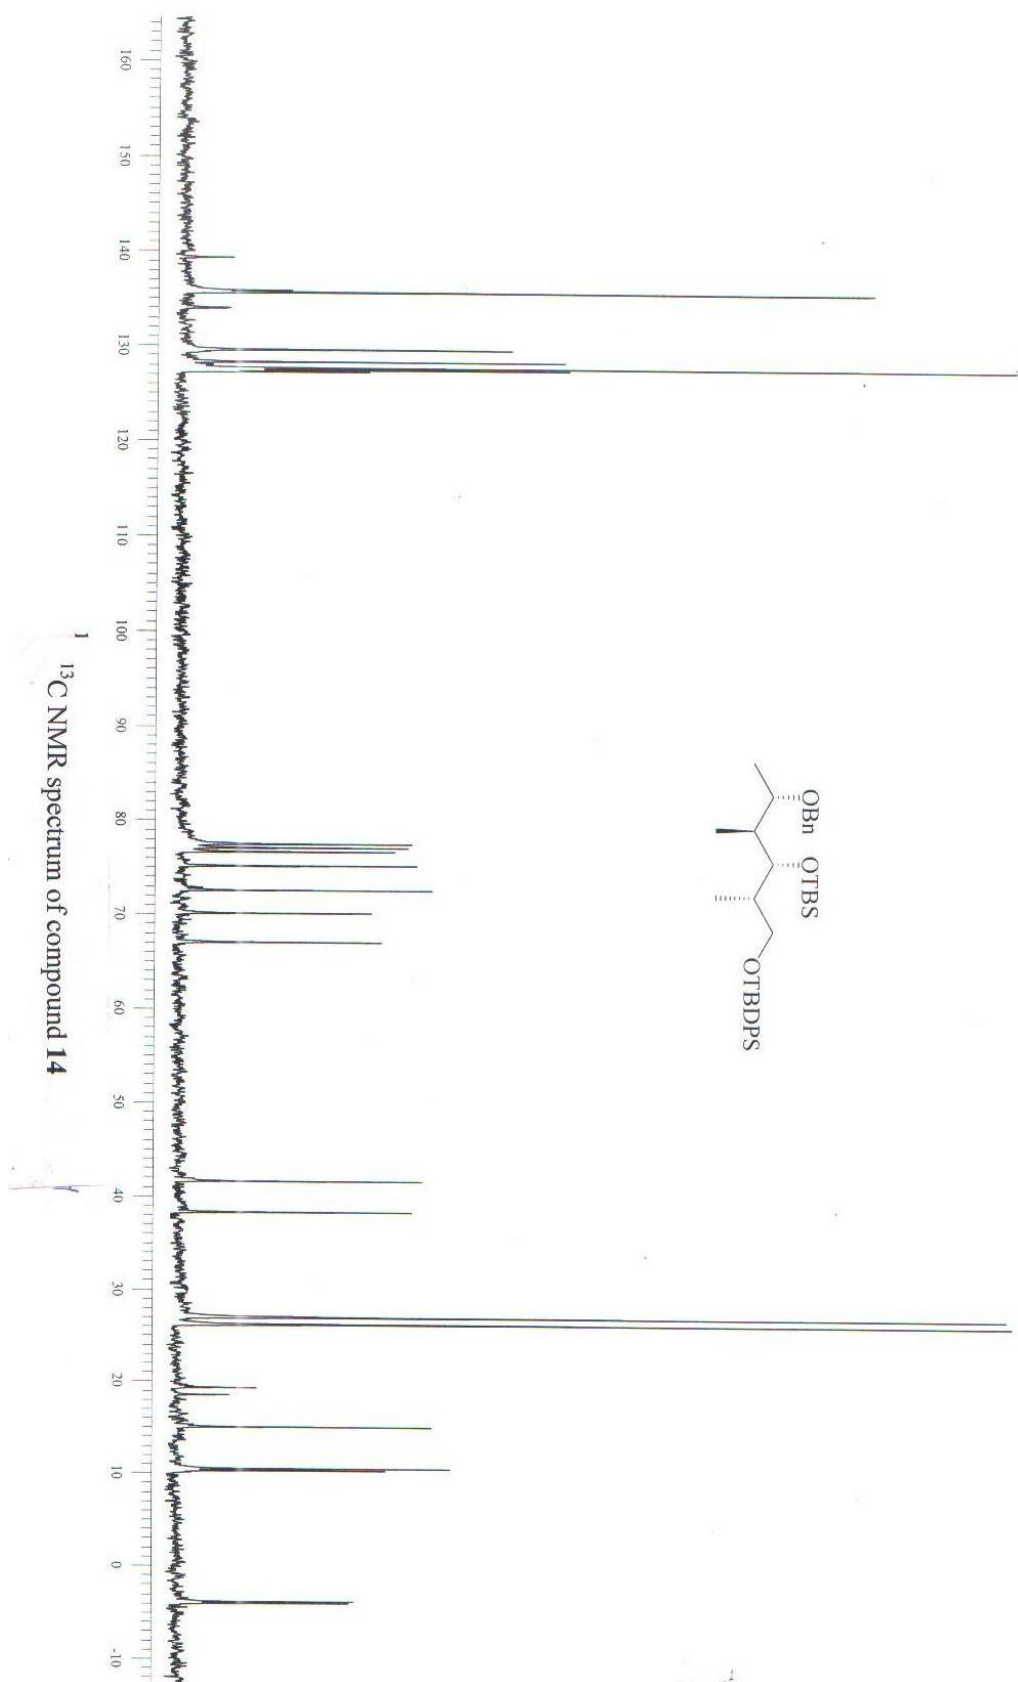

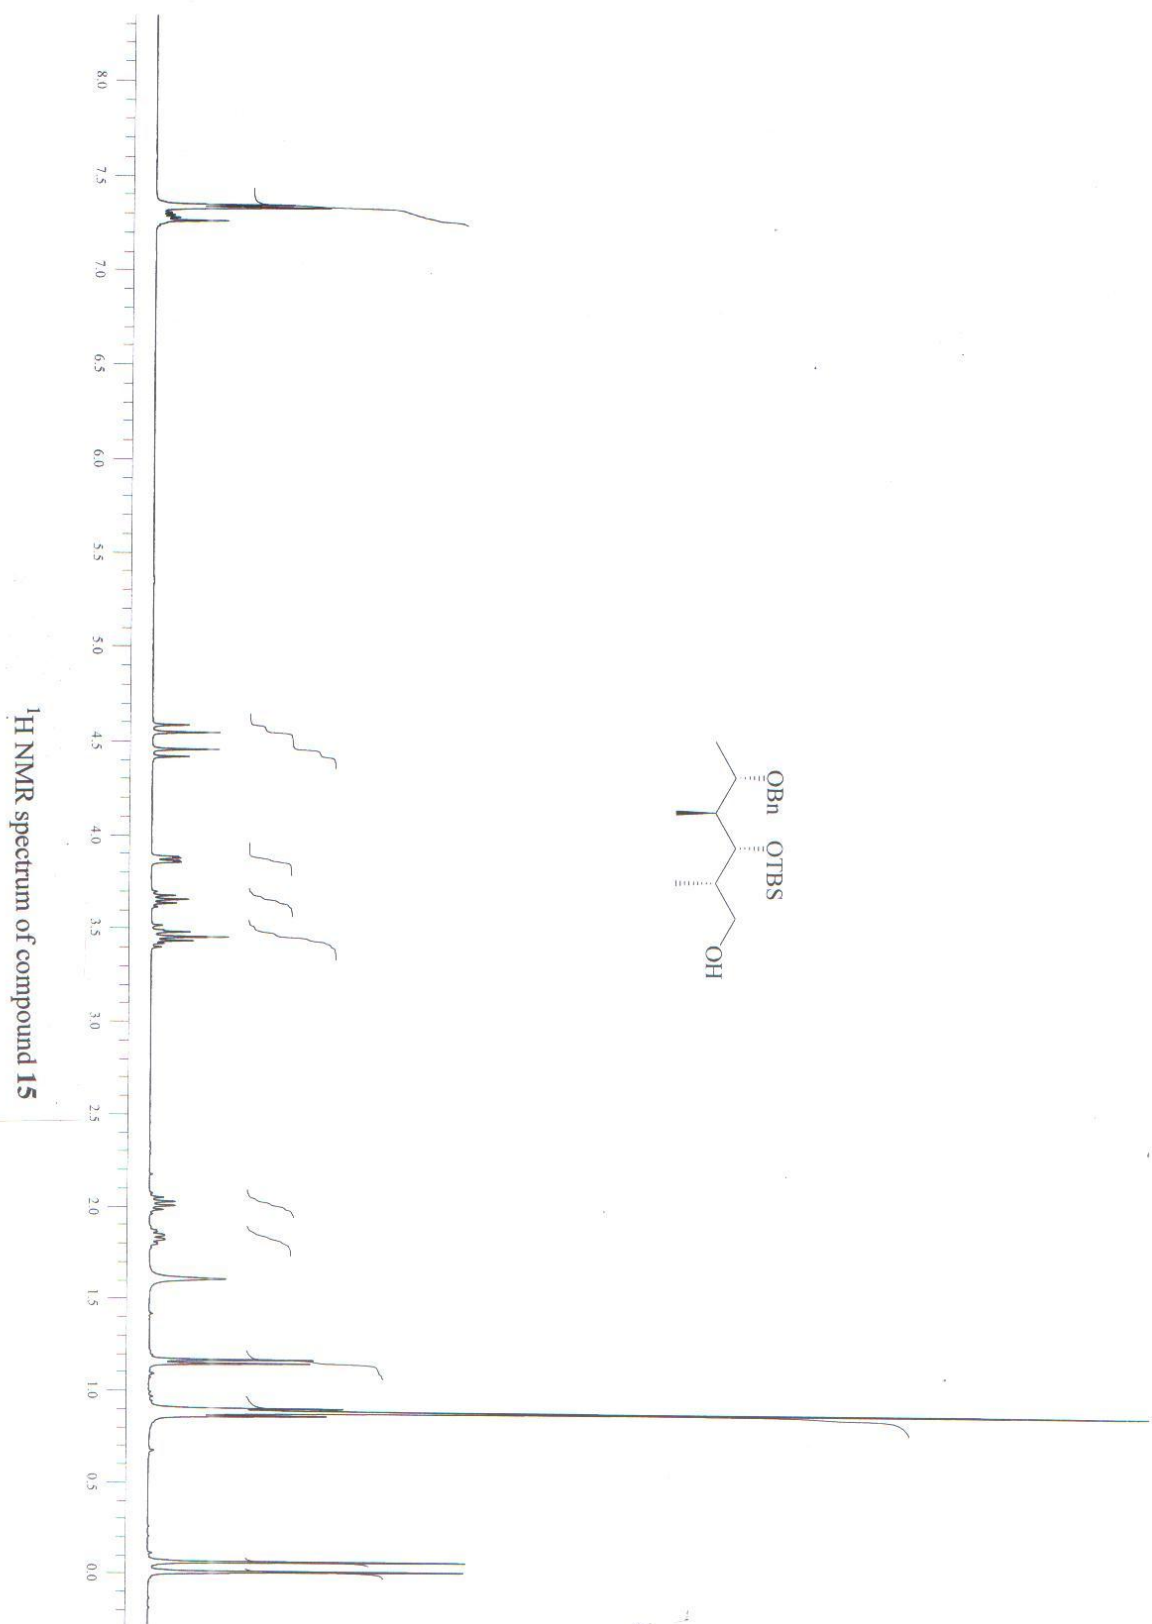

<sup>13</sup>C NMR spectrum of compound **15**

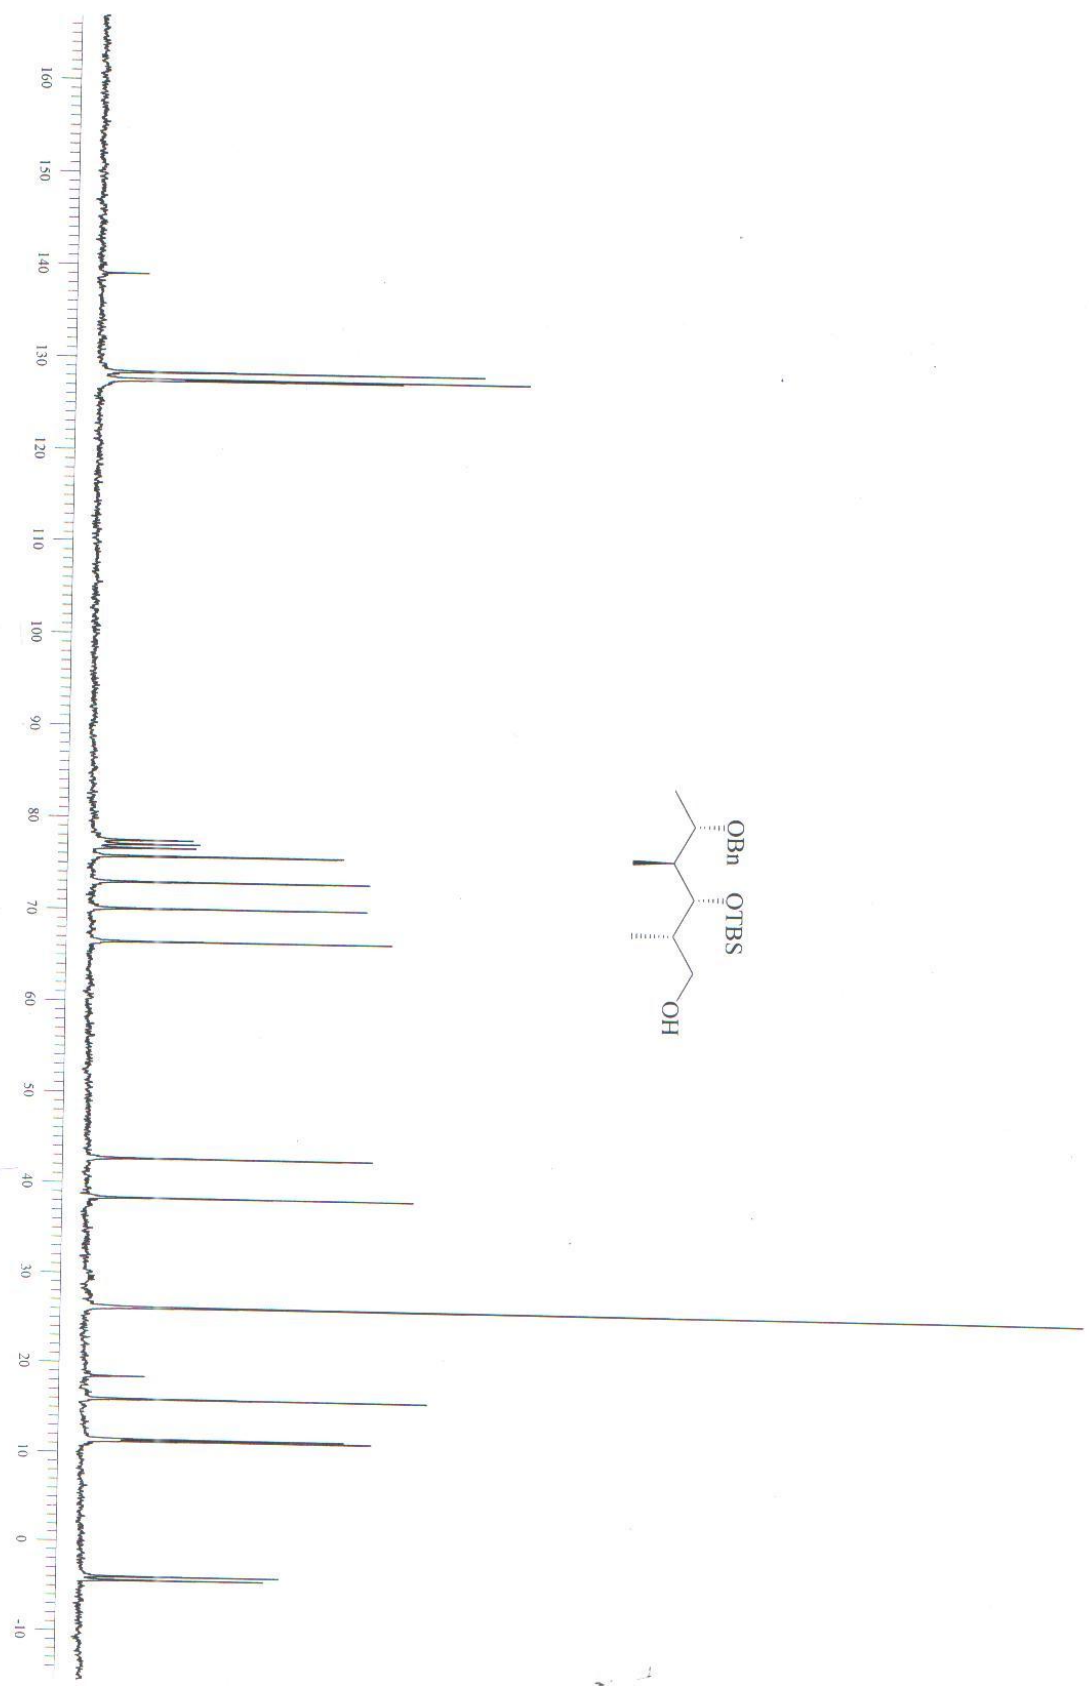

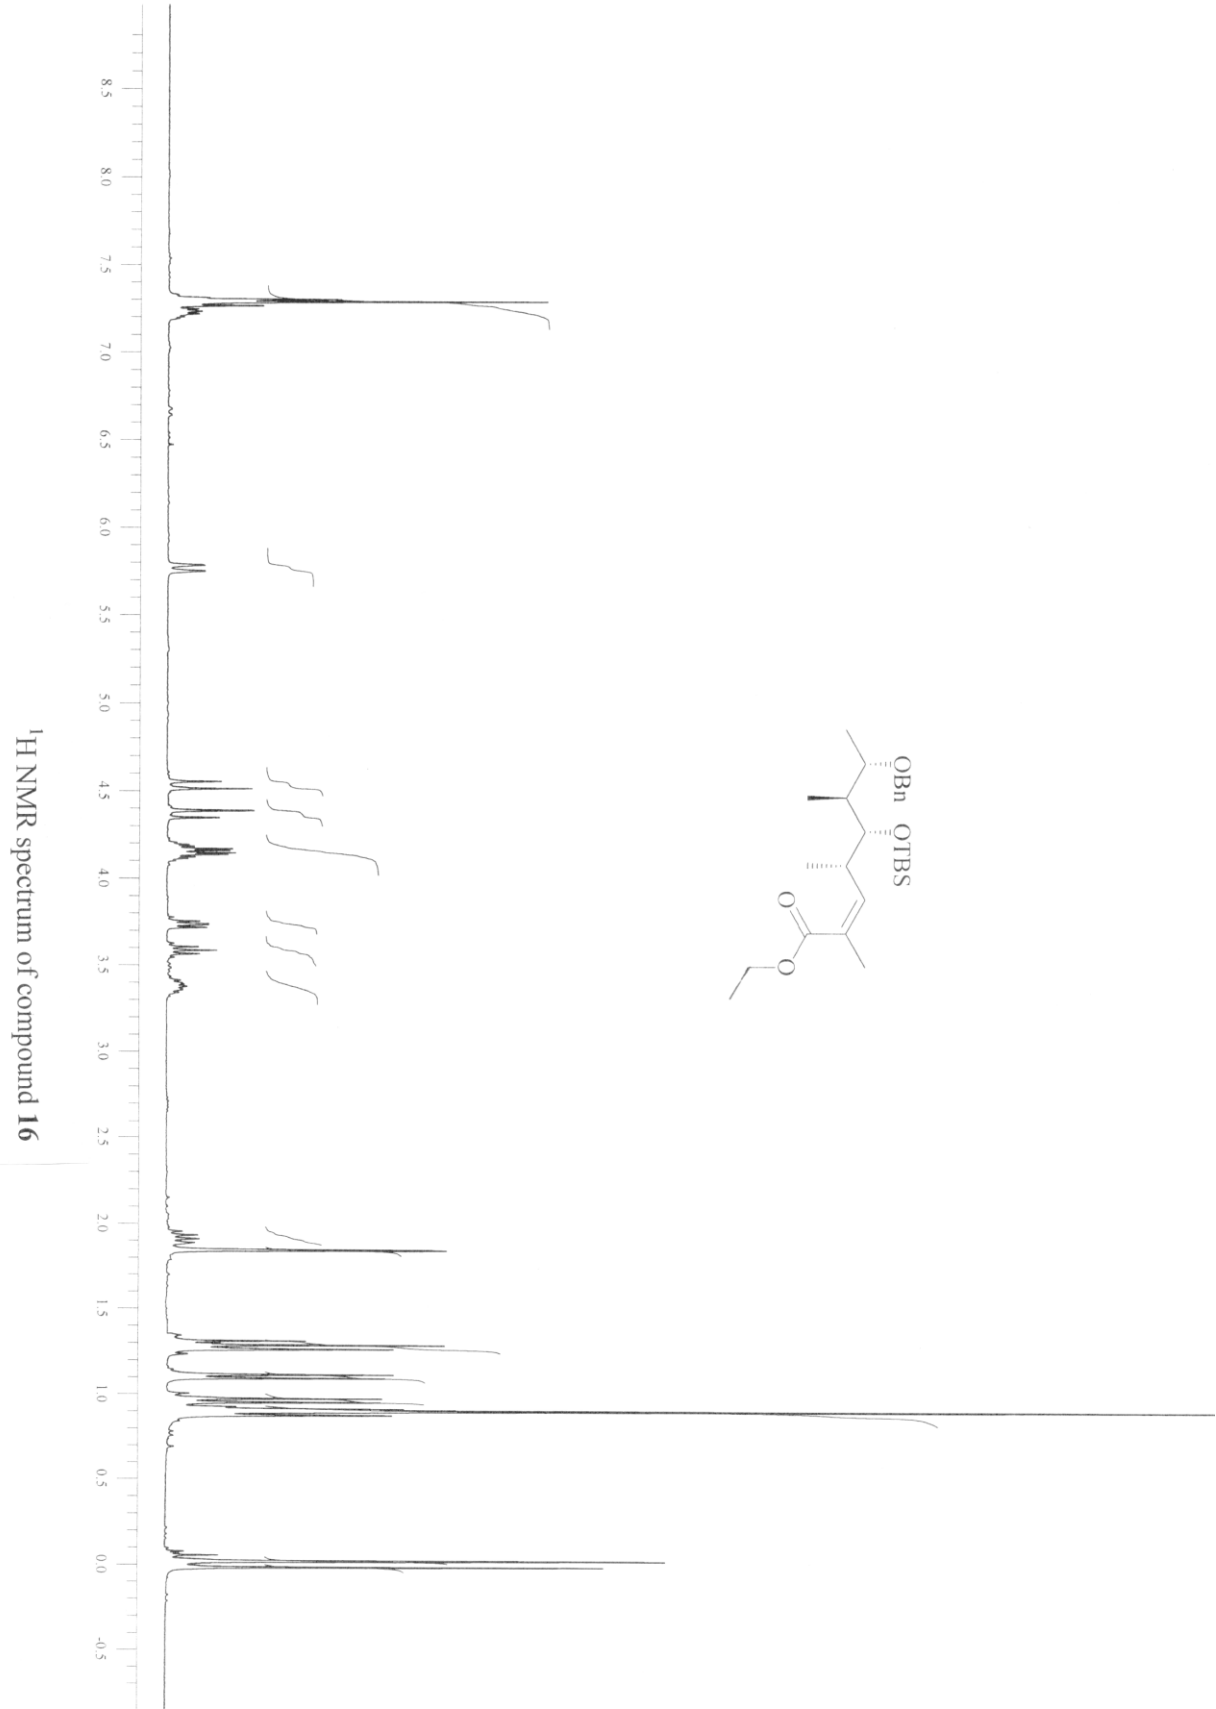

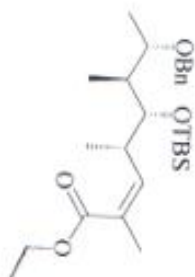

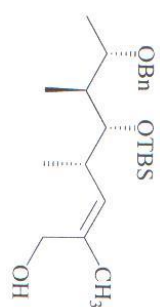

<sup>1</sup>H NMR spectrum of compound **17**

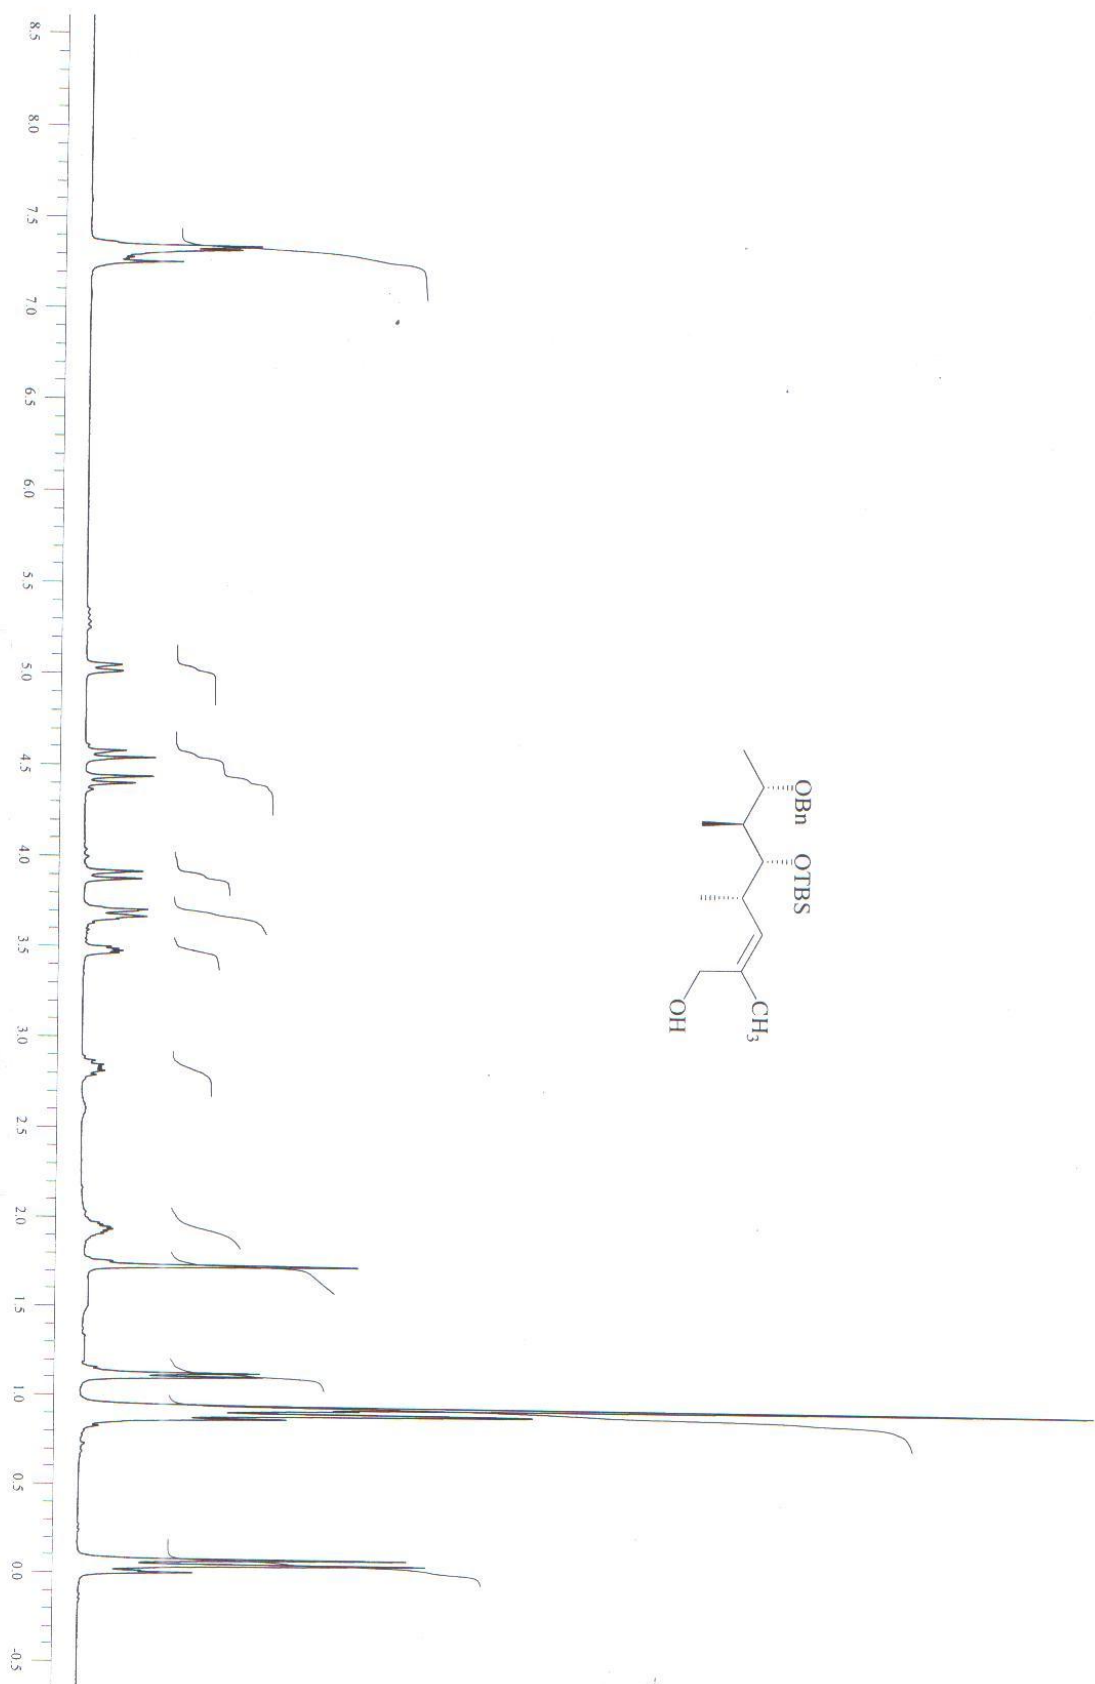

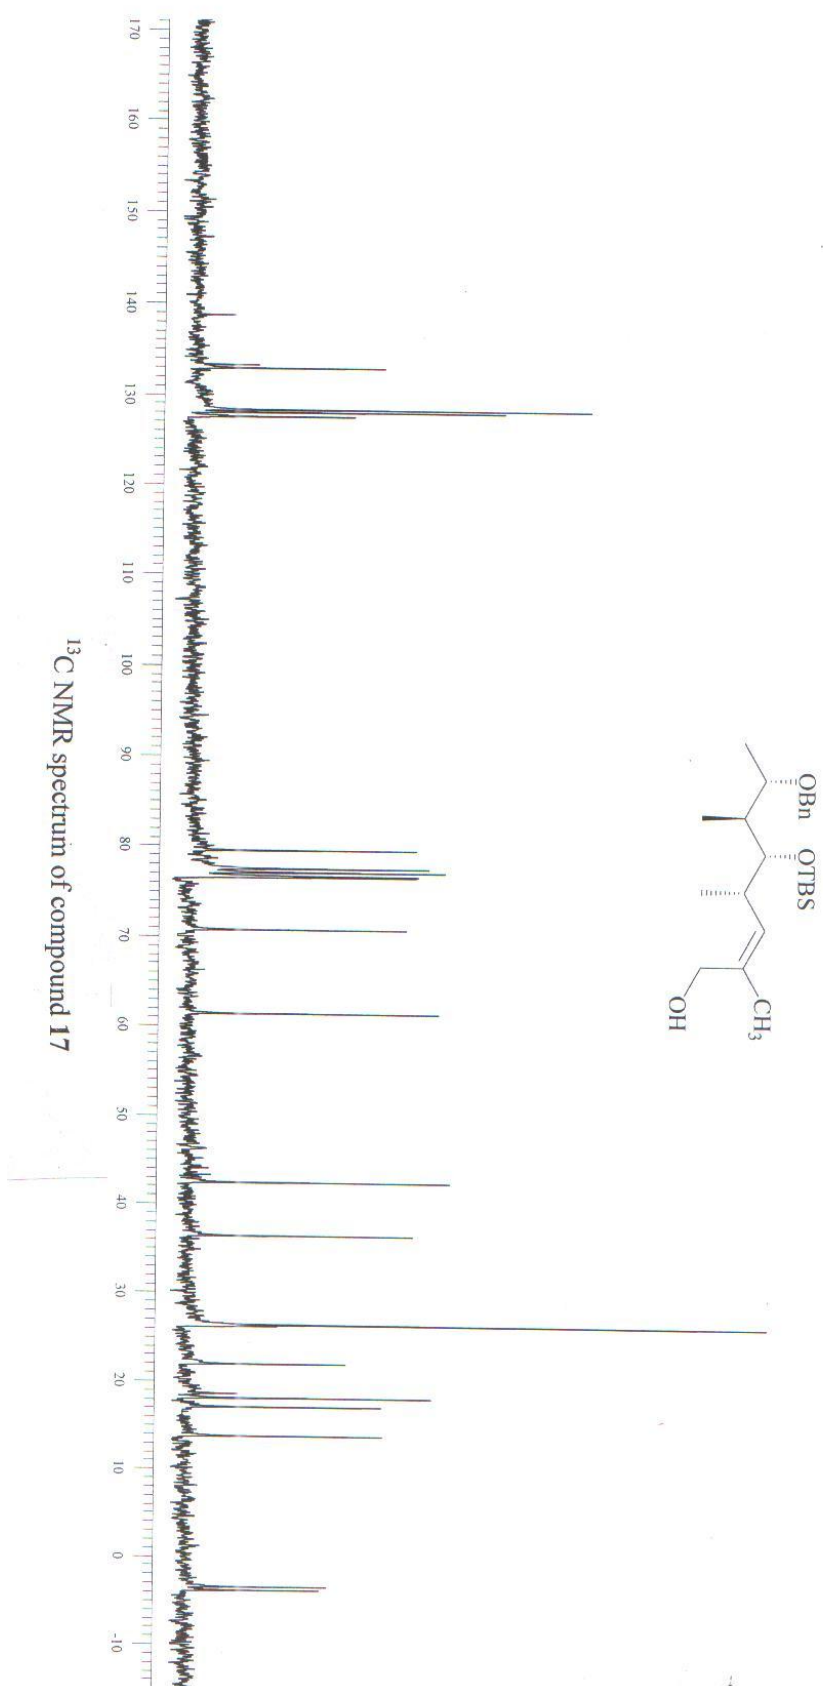

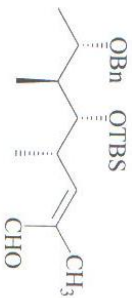

<sup>1</sup>H NMR spectrum of compound 7

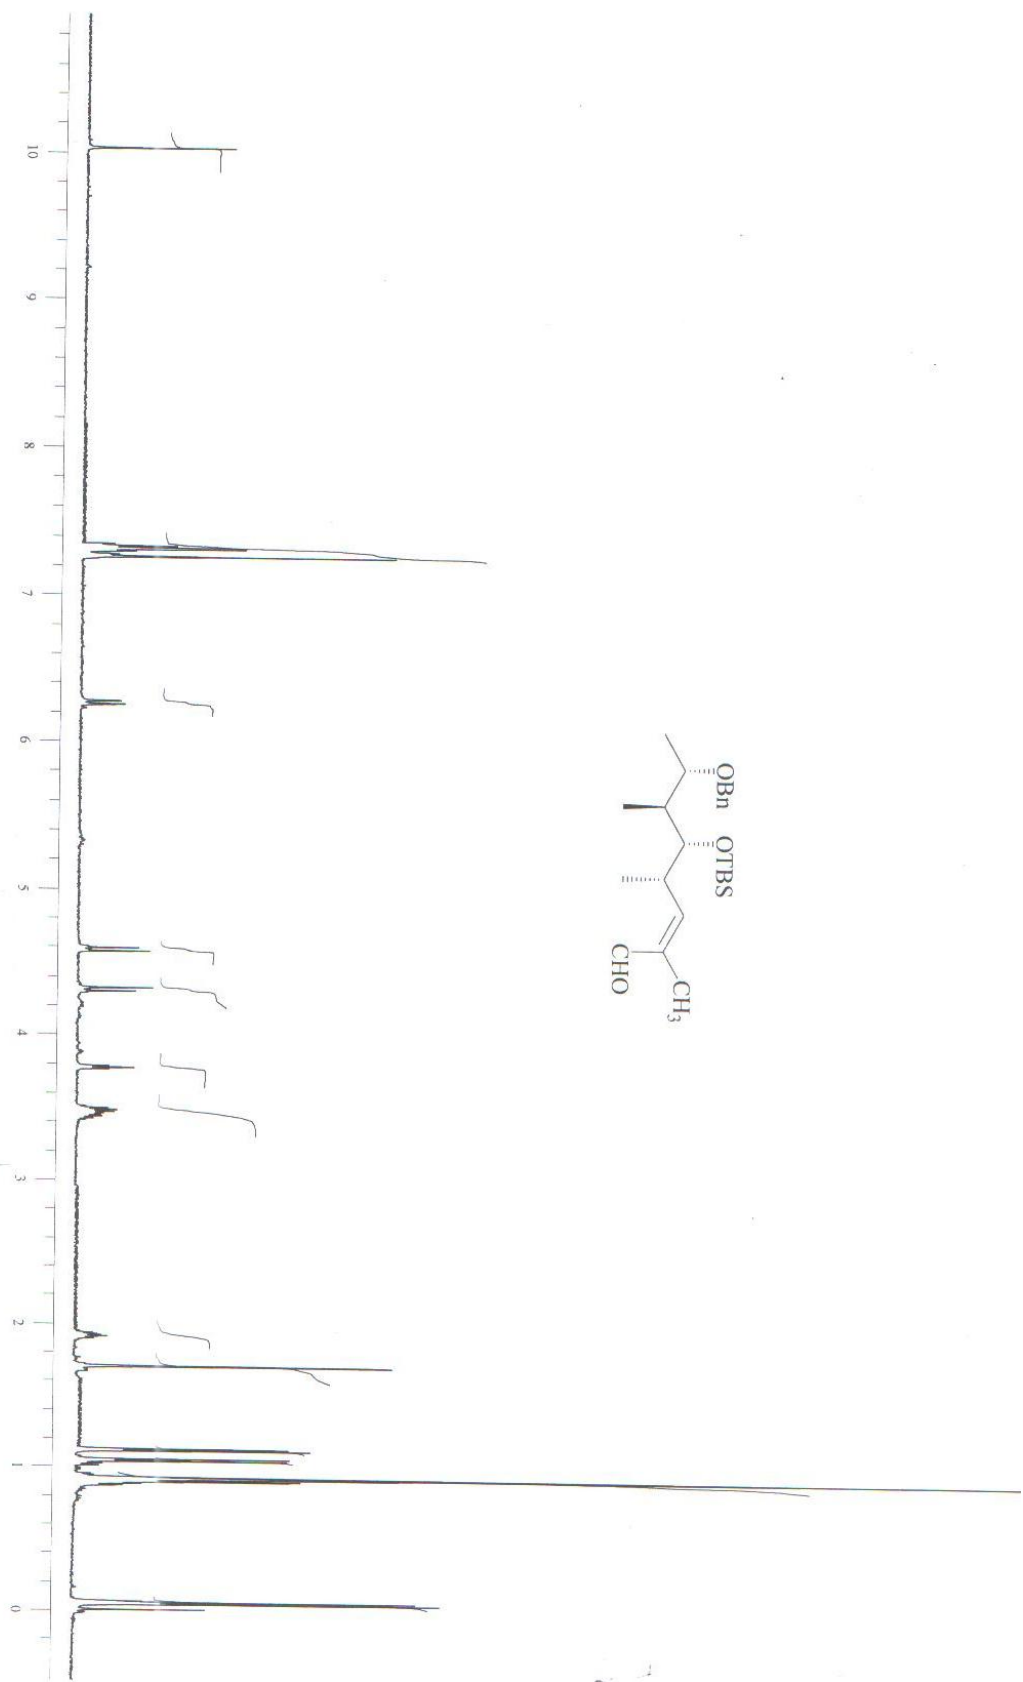



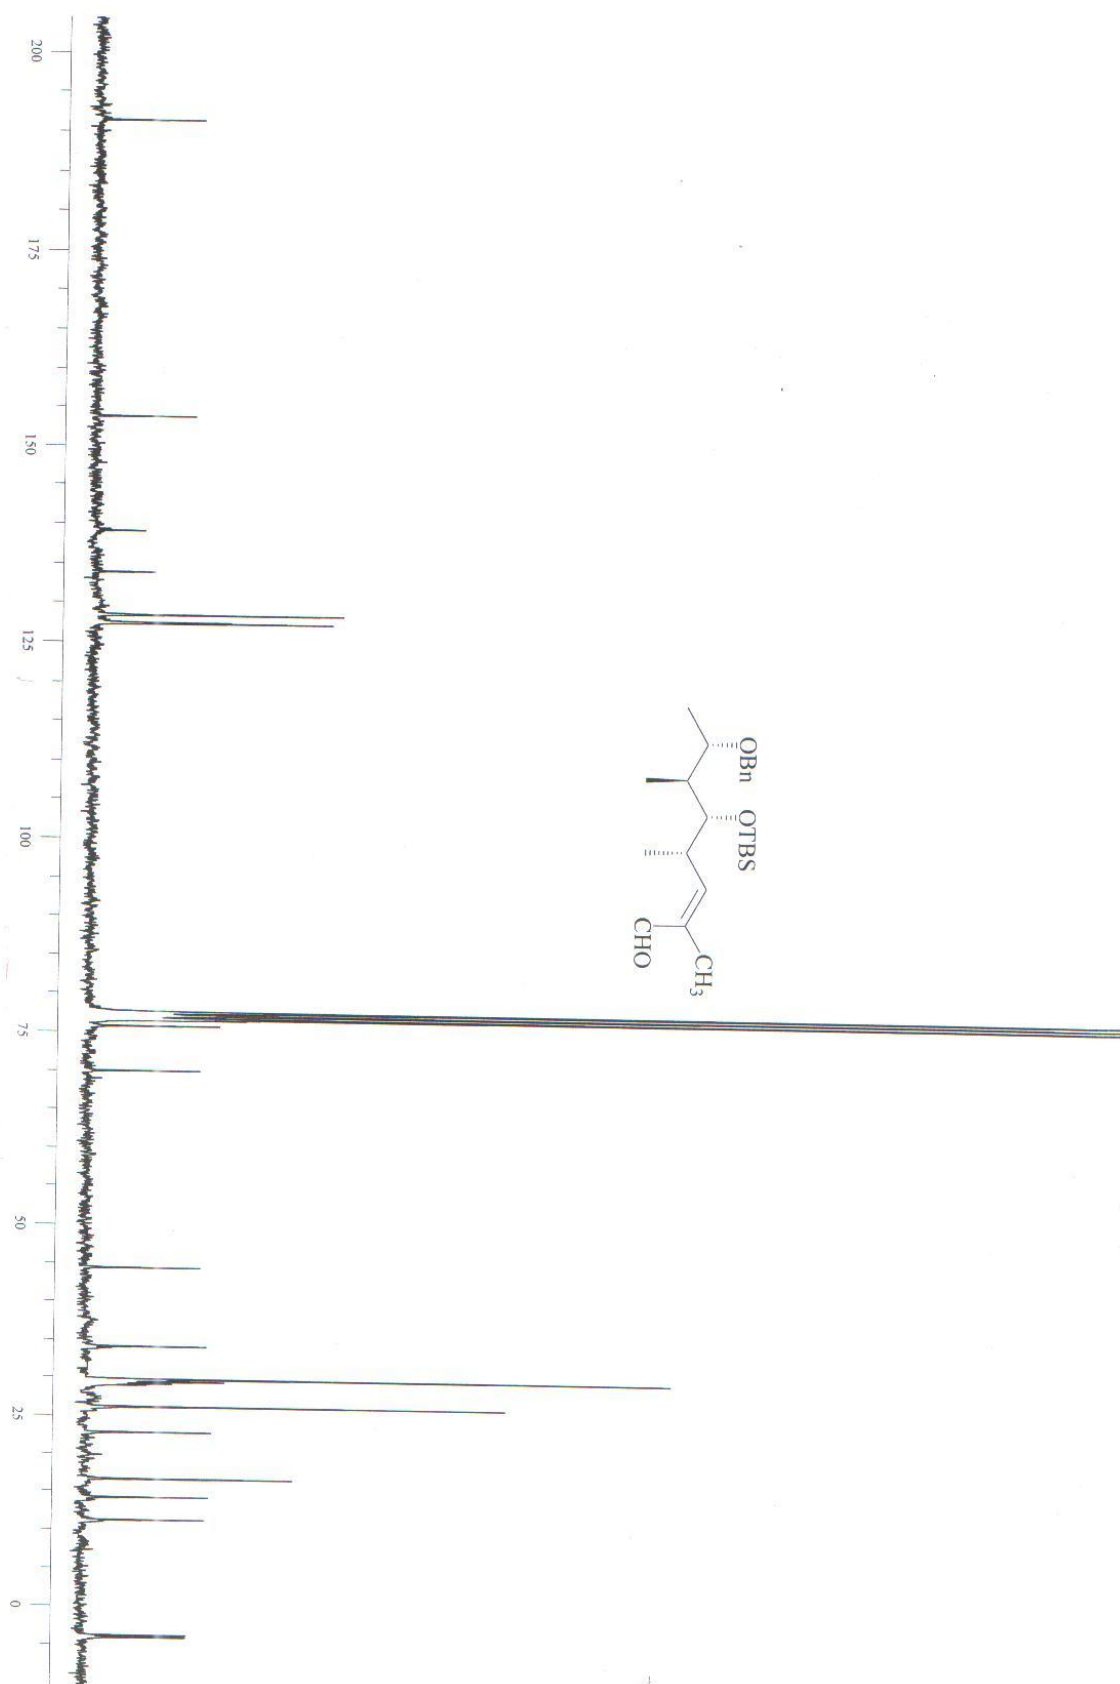

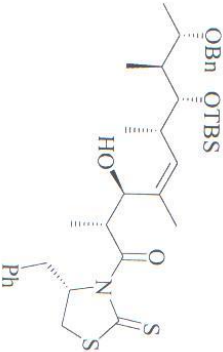

<sup>1</sup>H NMR spectrum of compound 19e

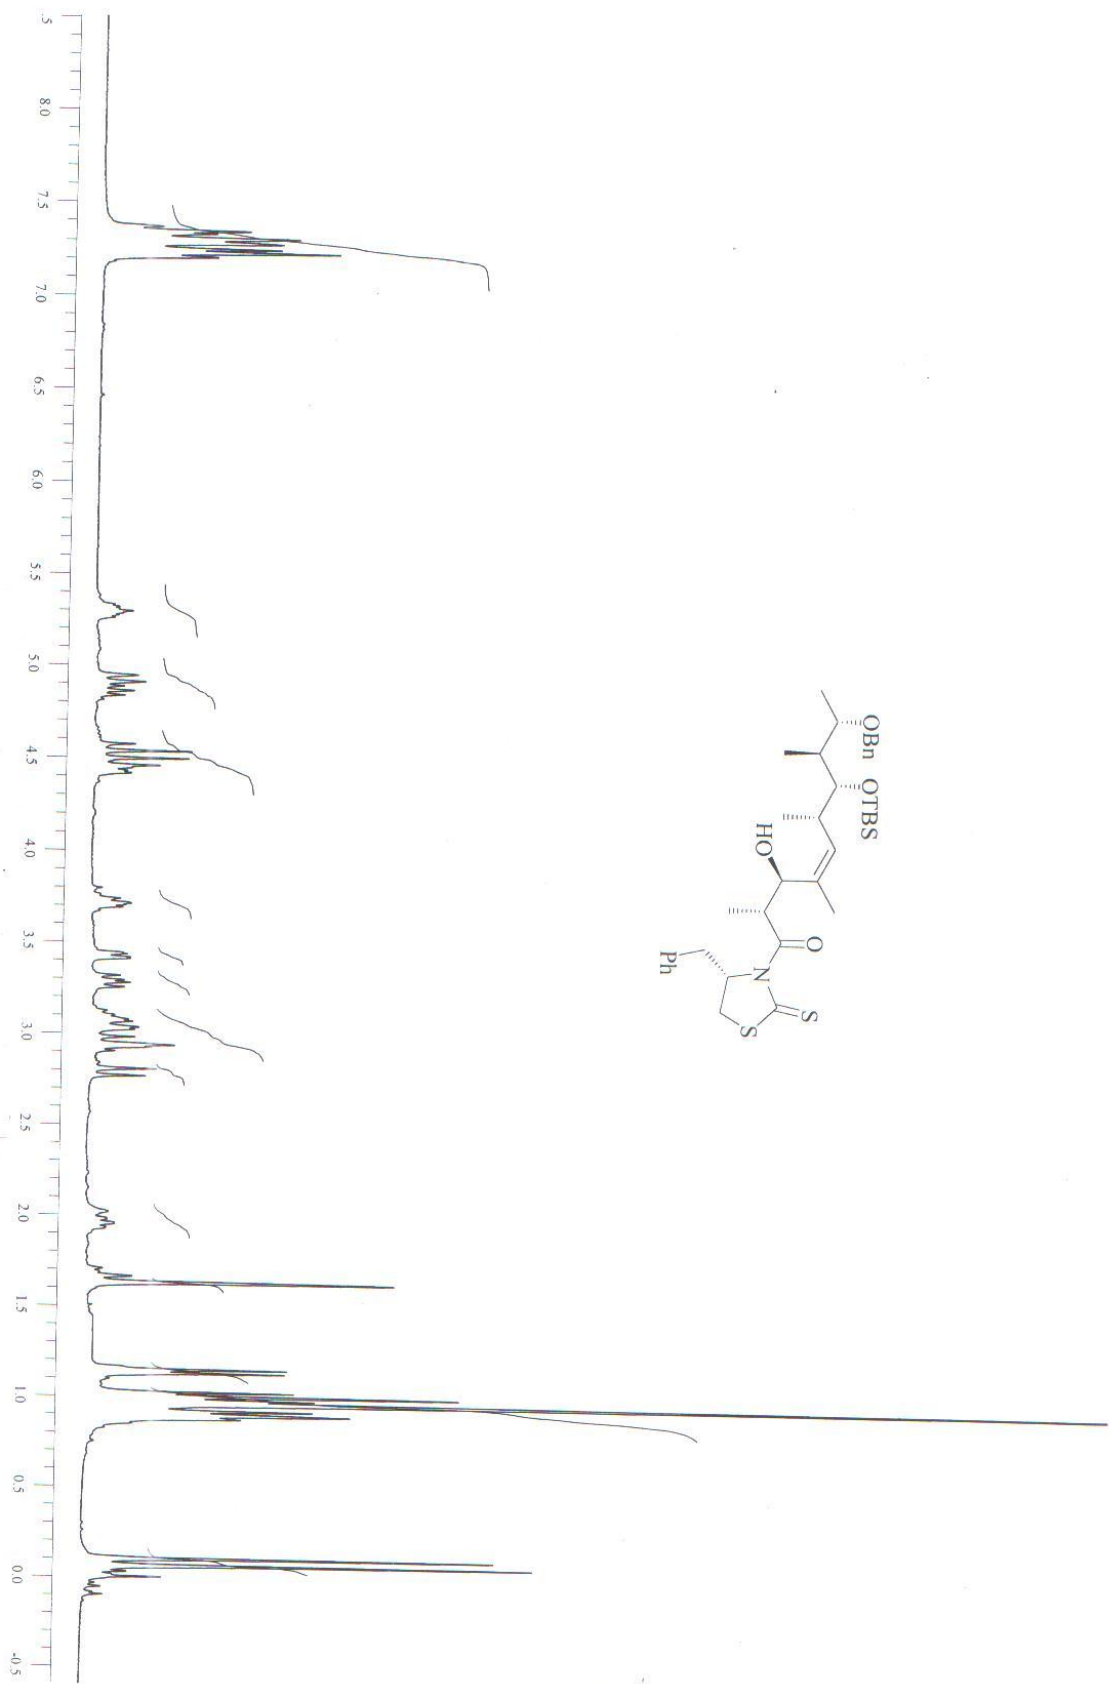

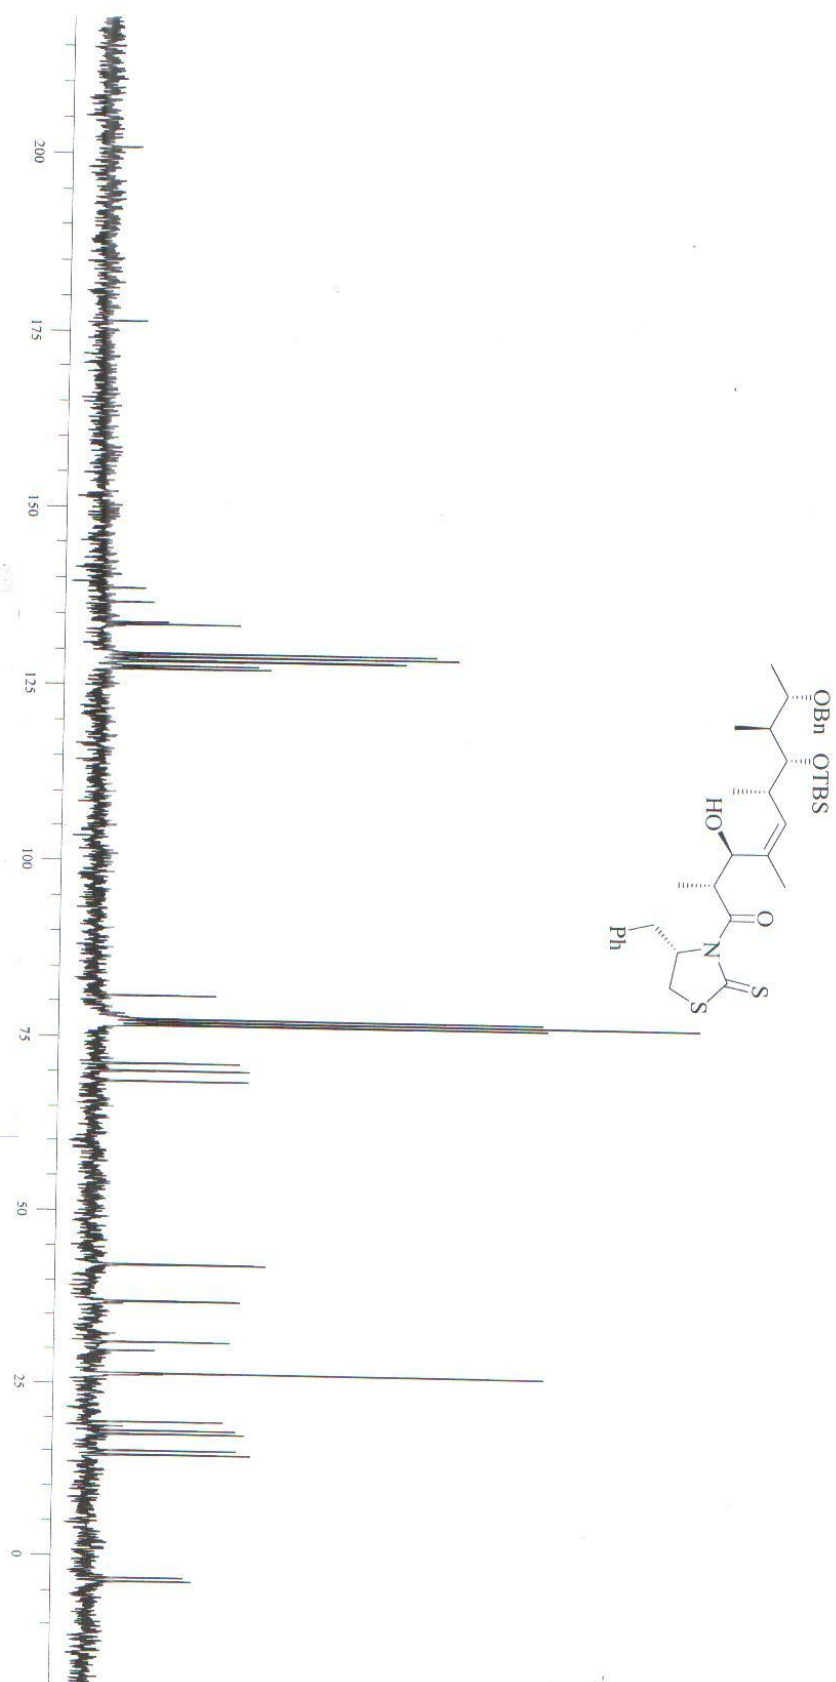

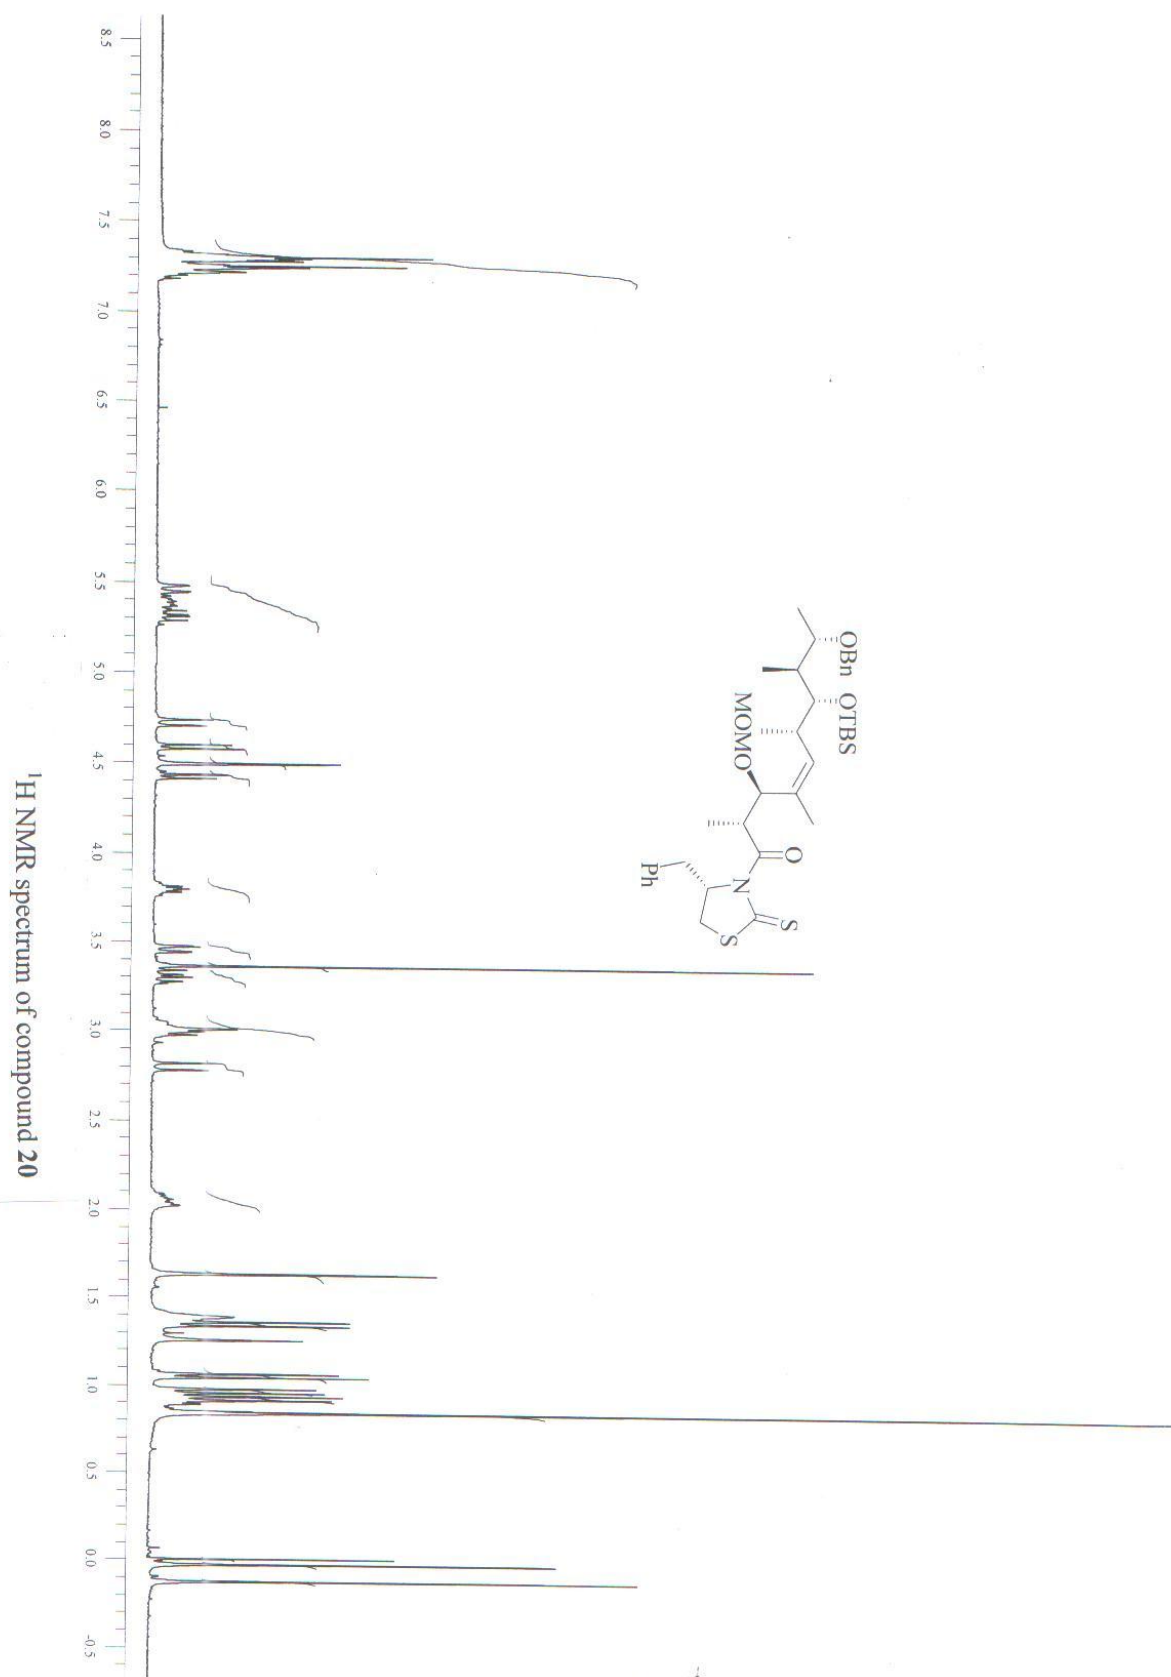

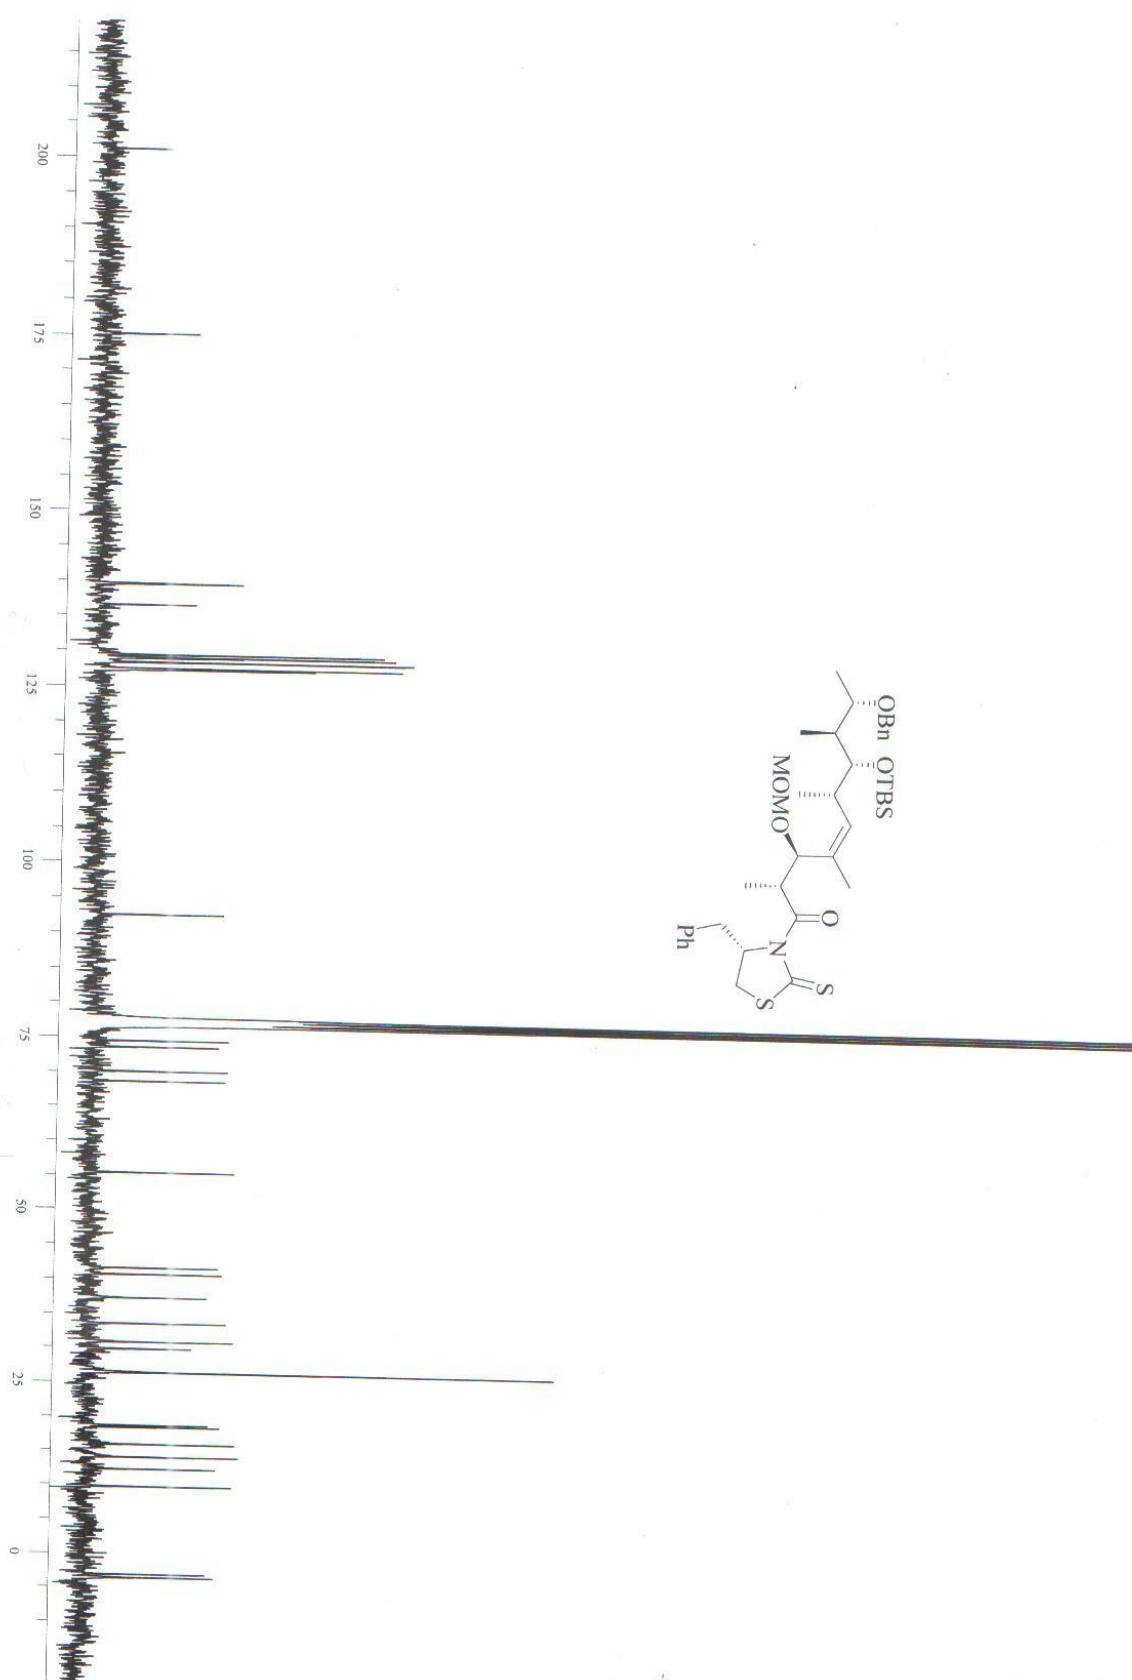

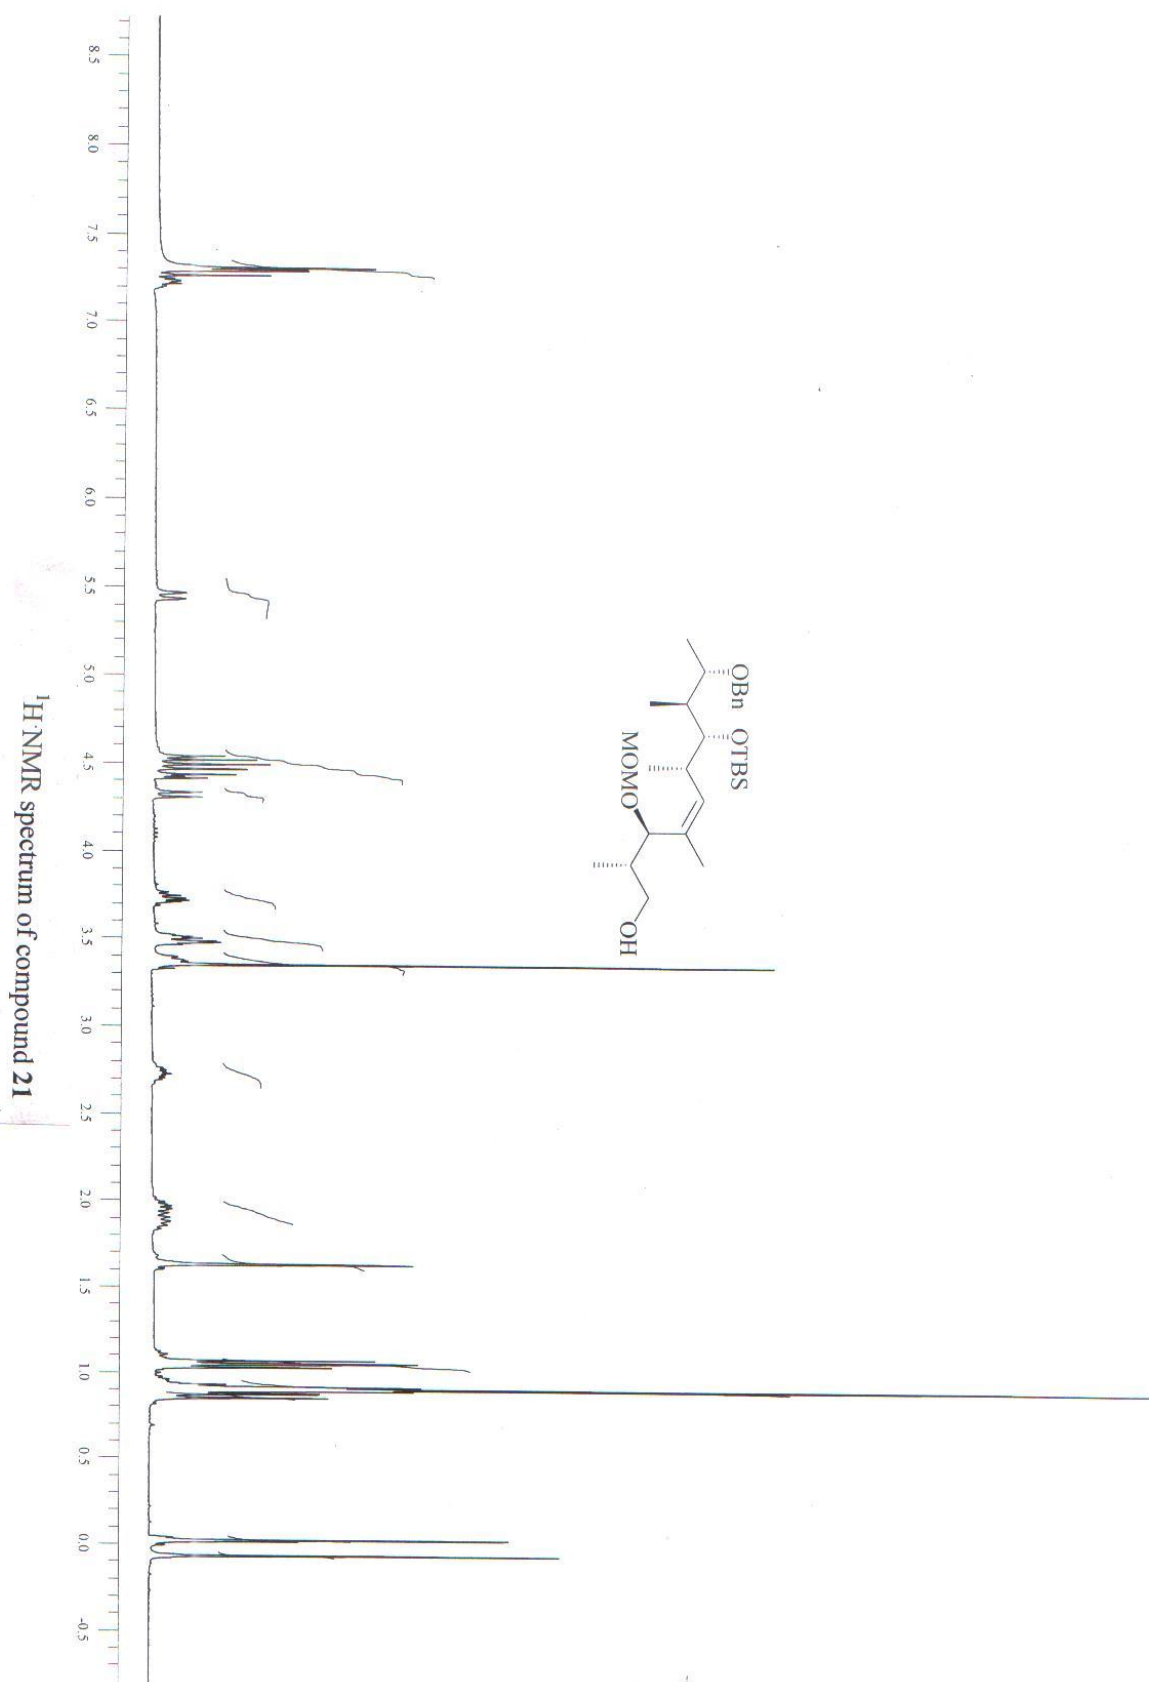

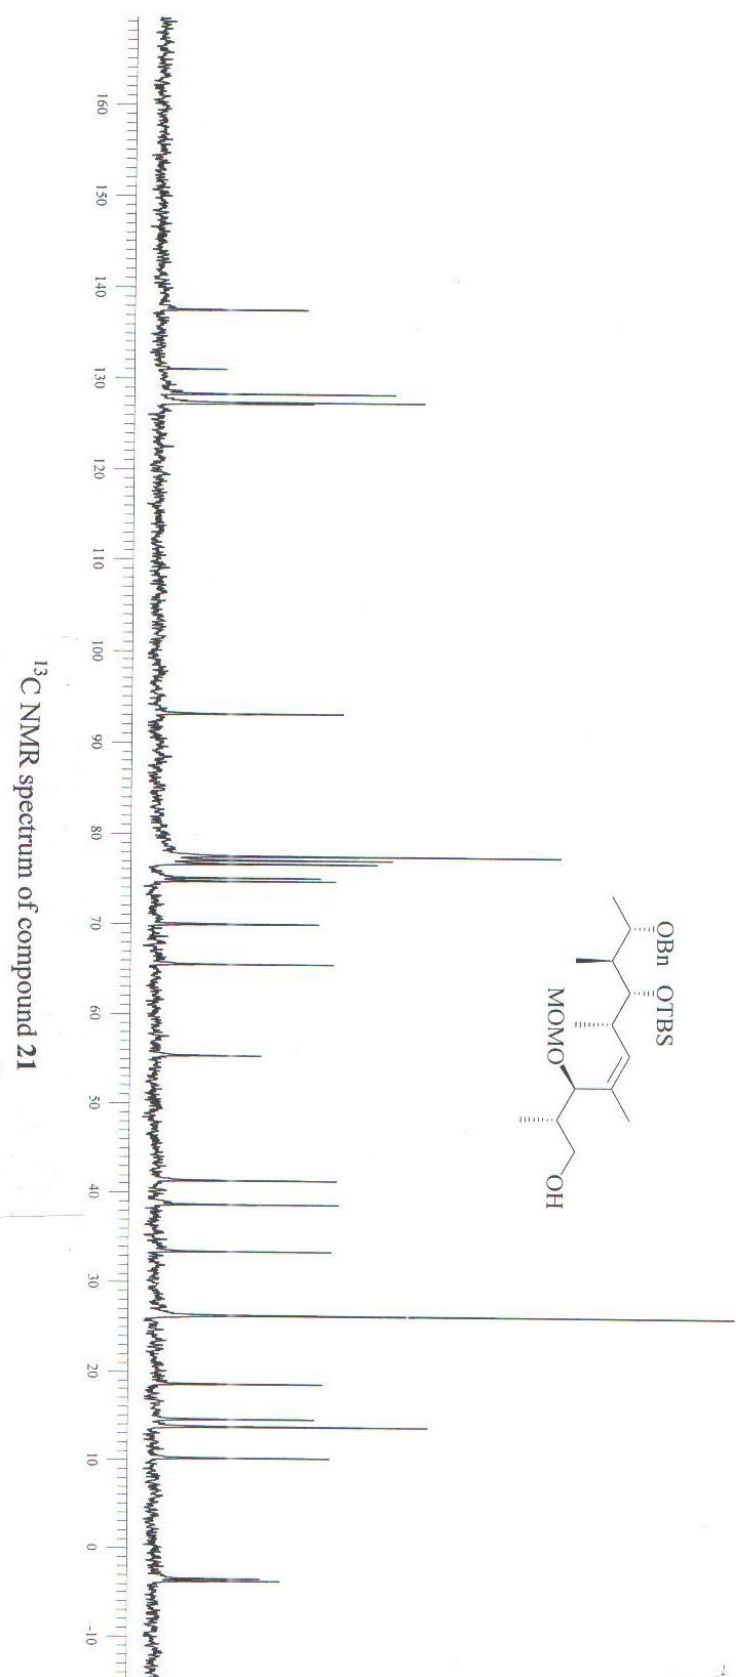

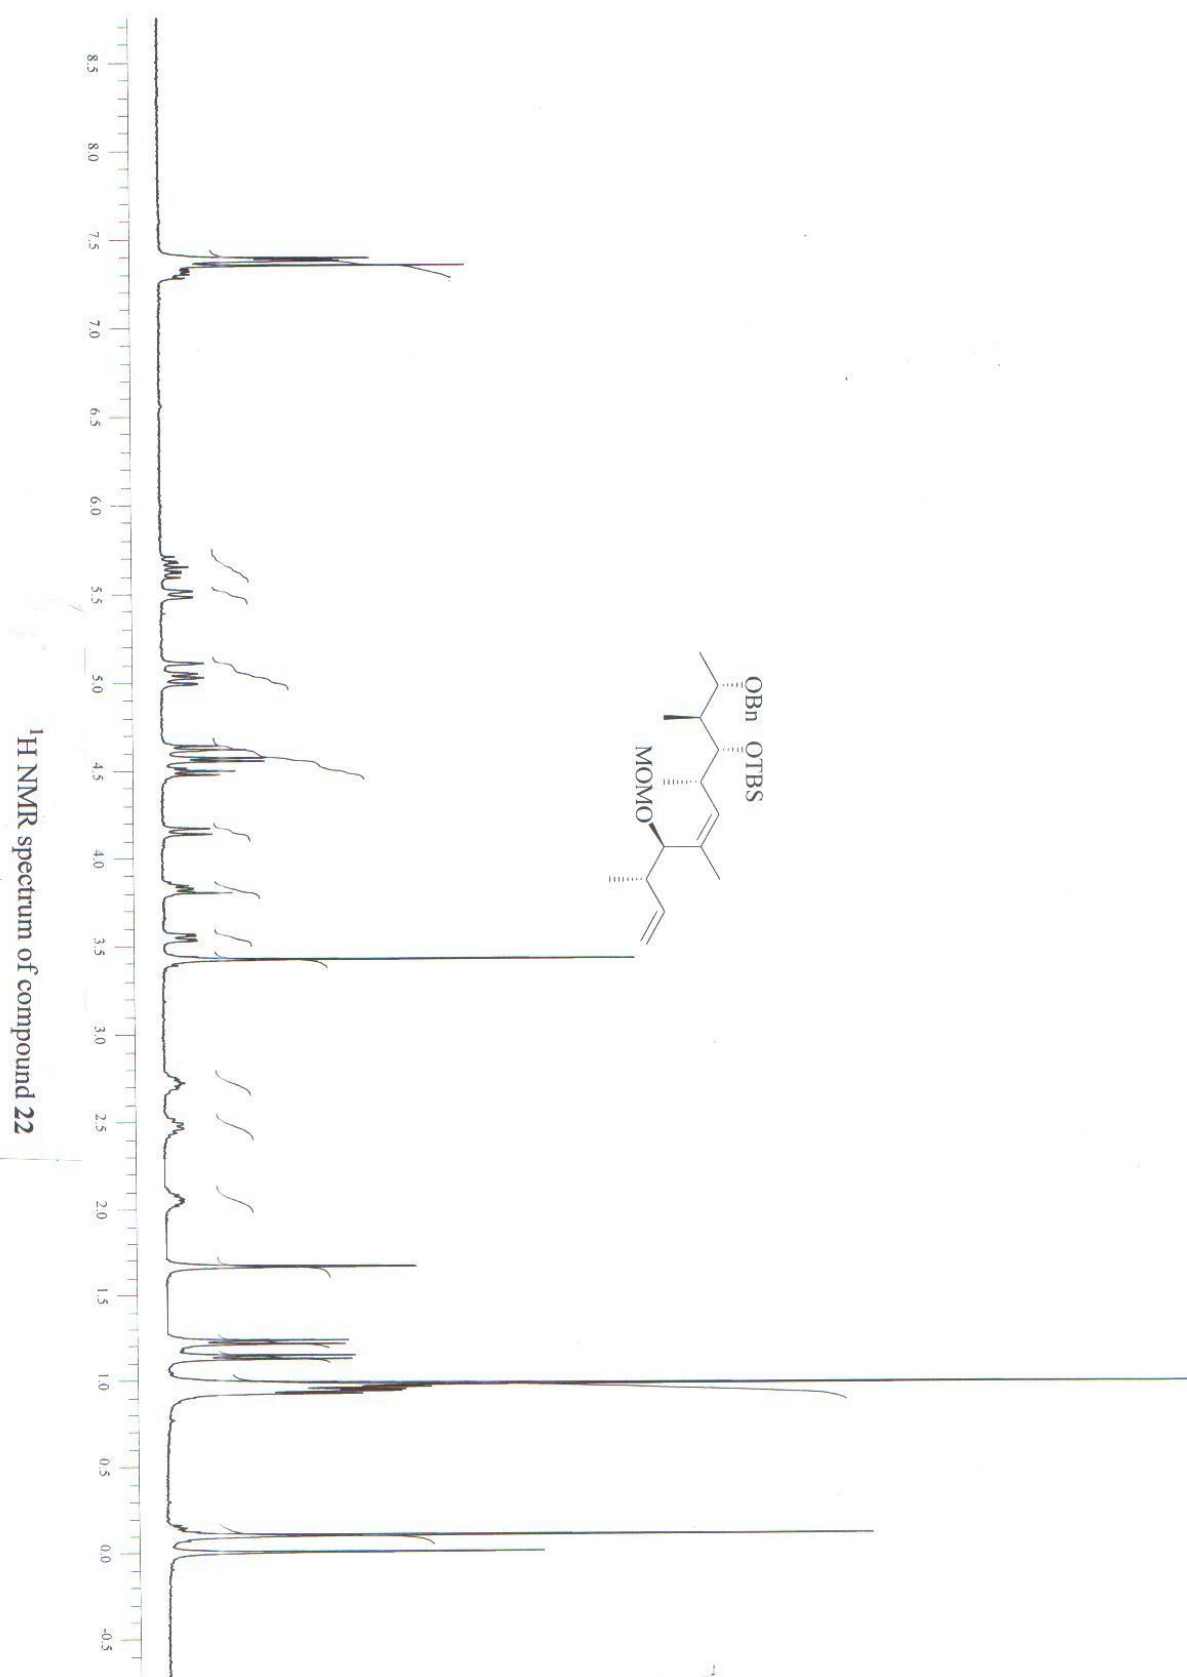



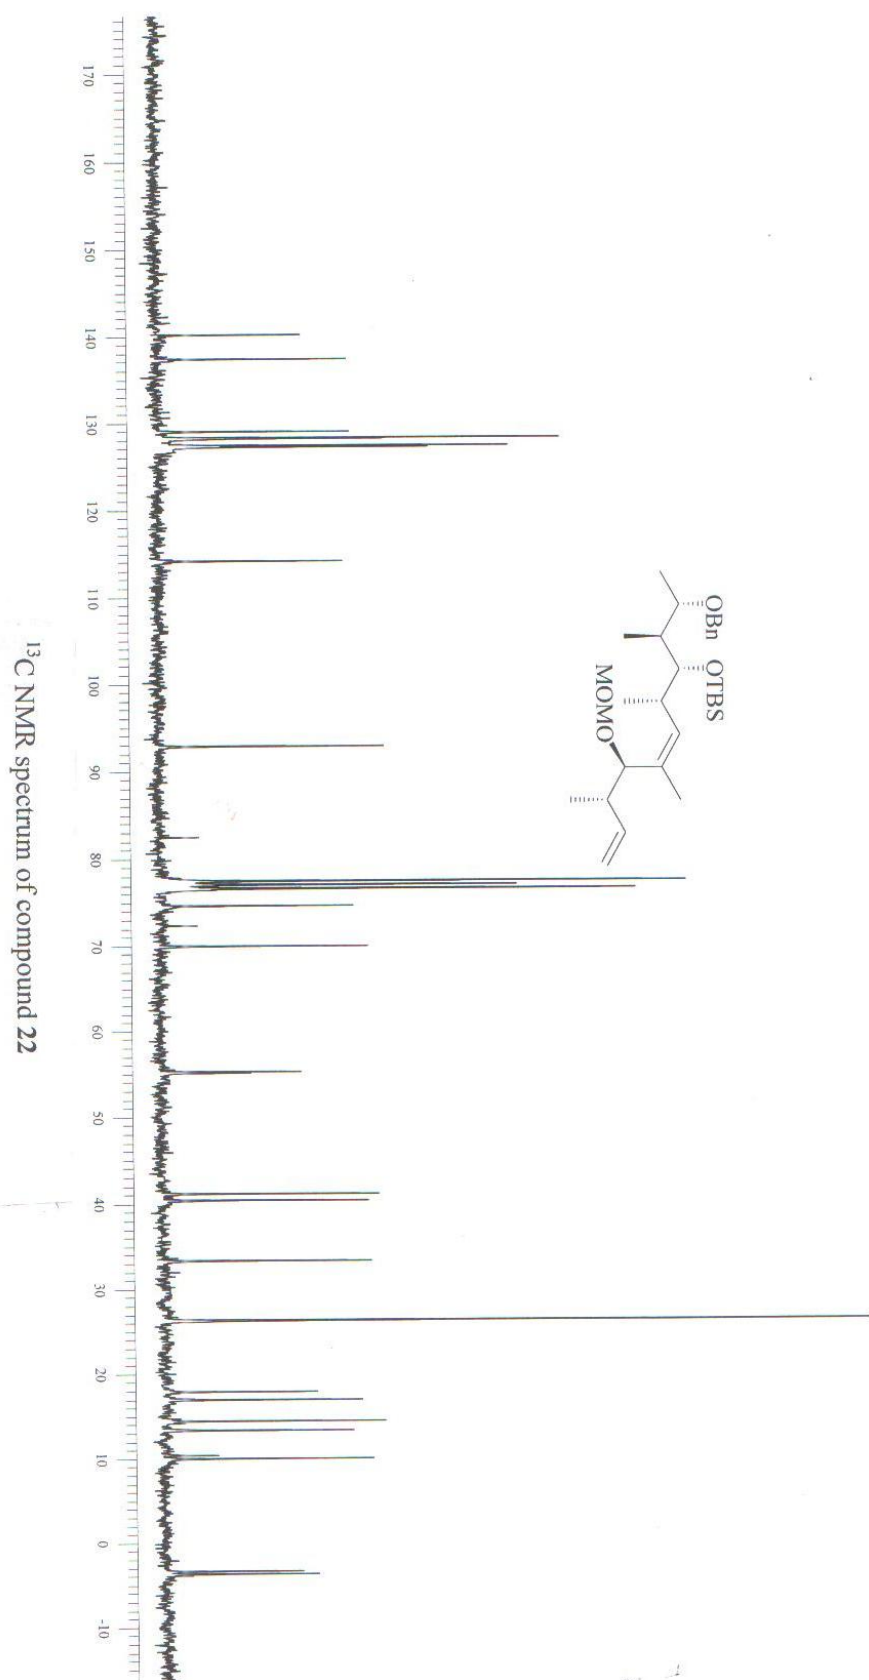

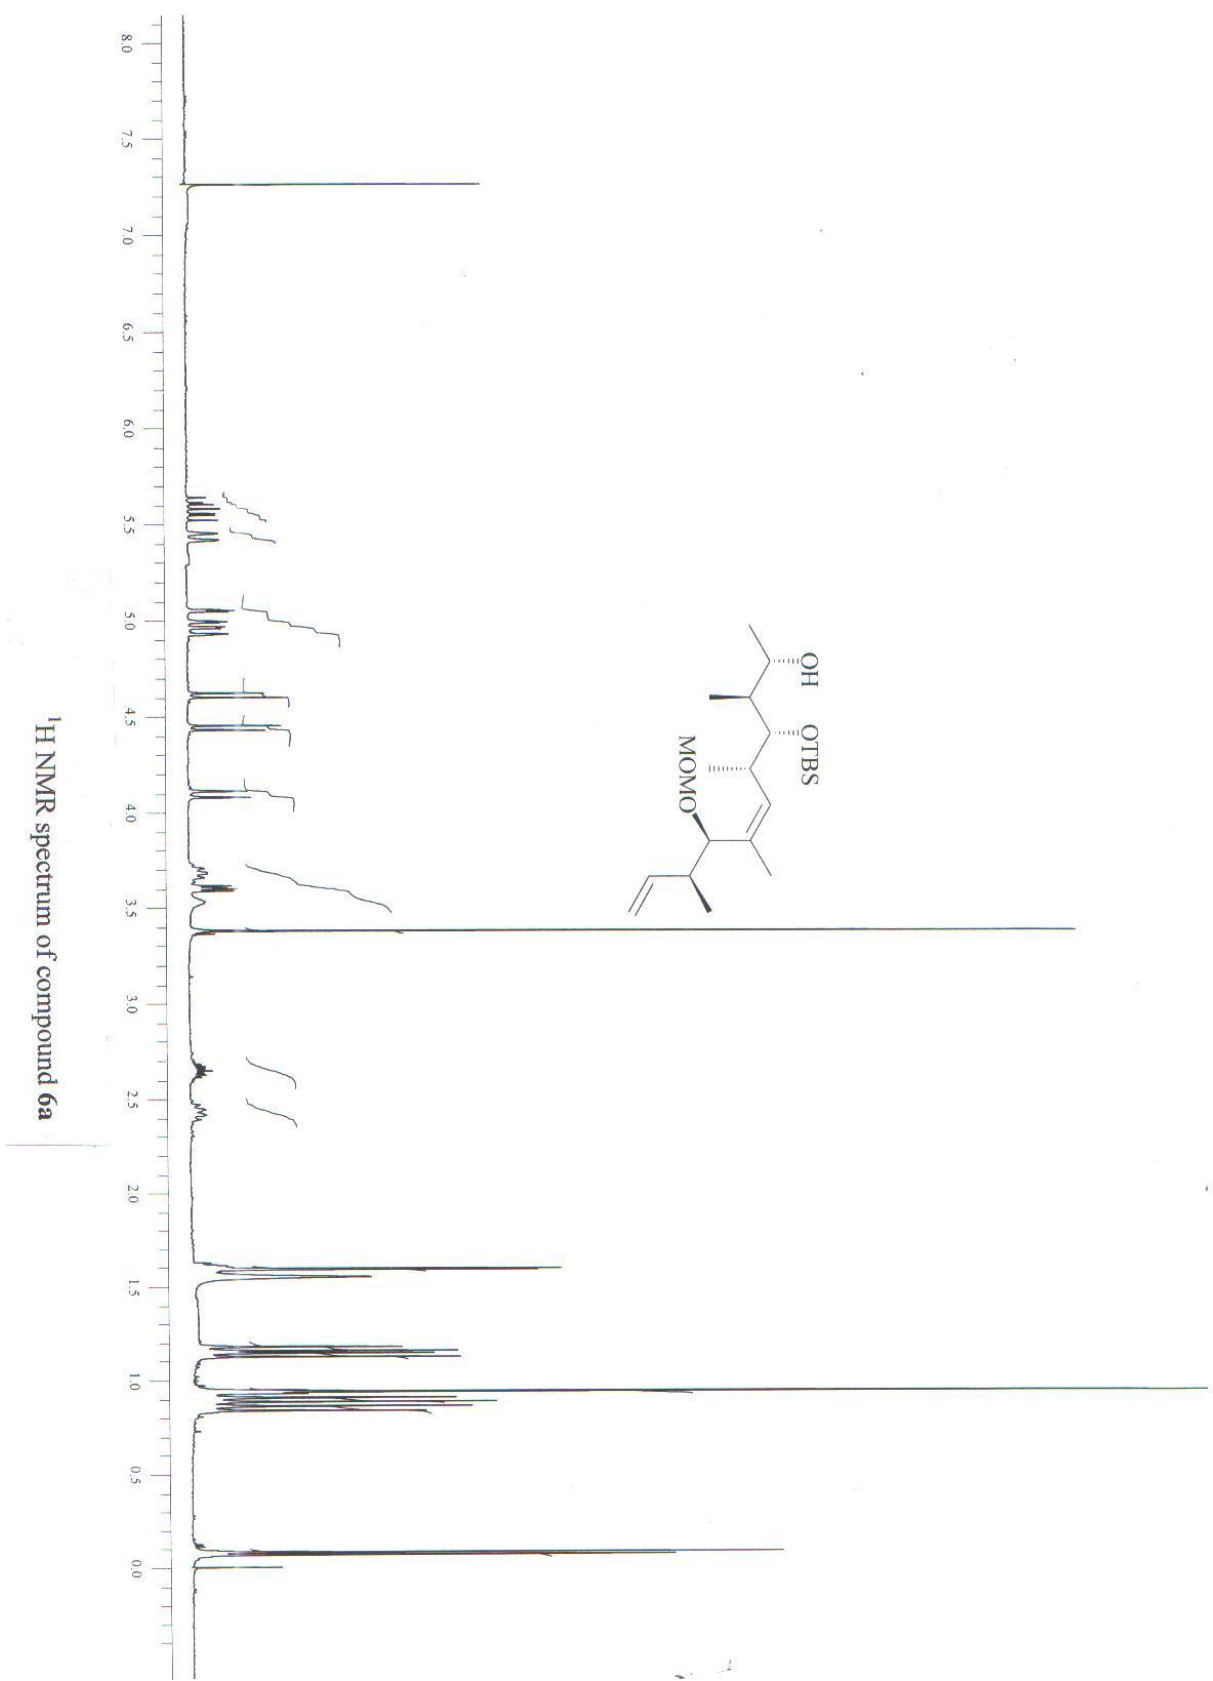

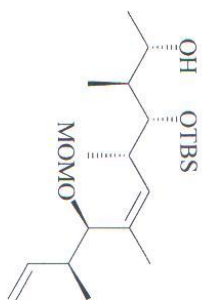

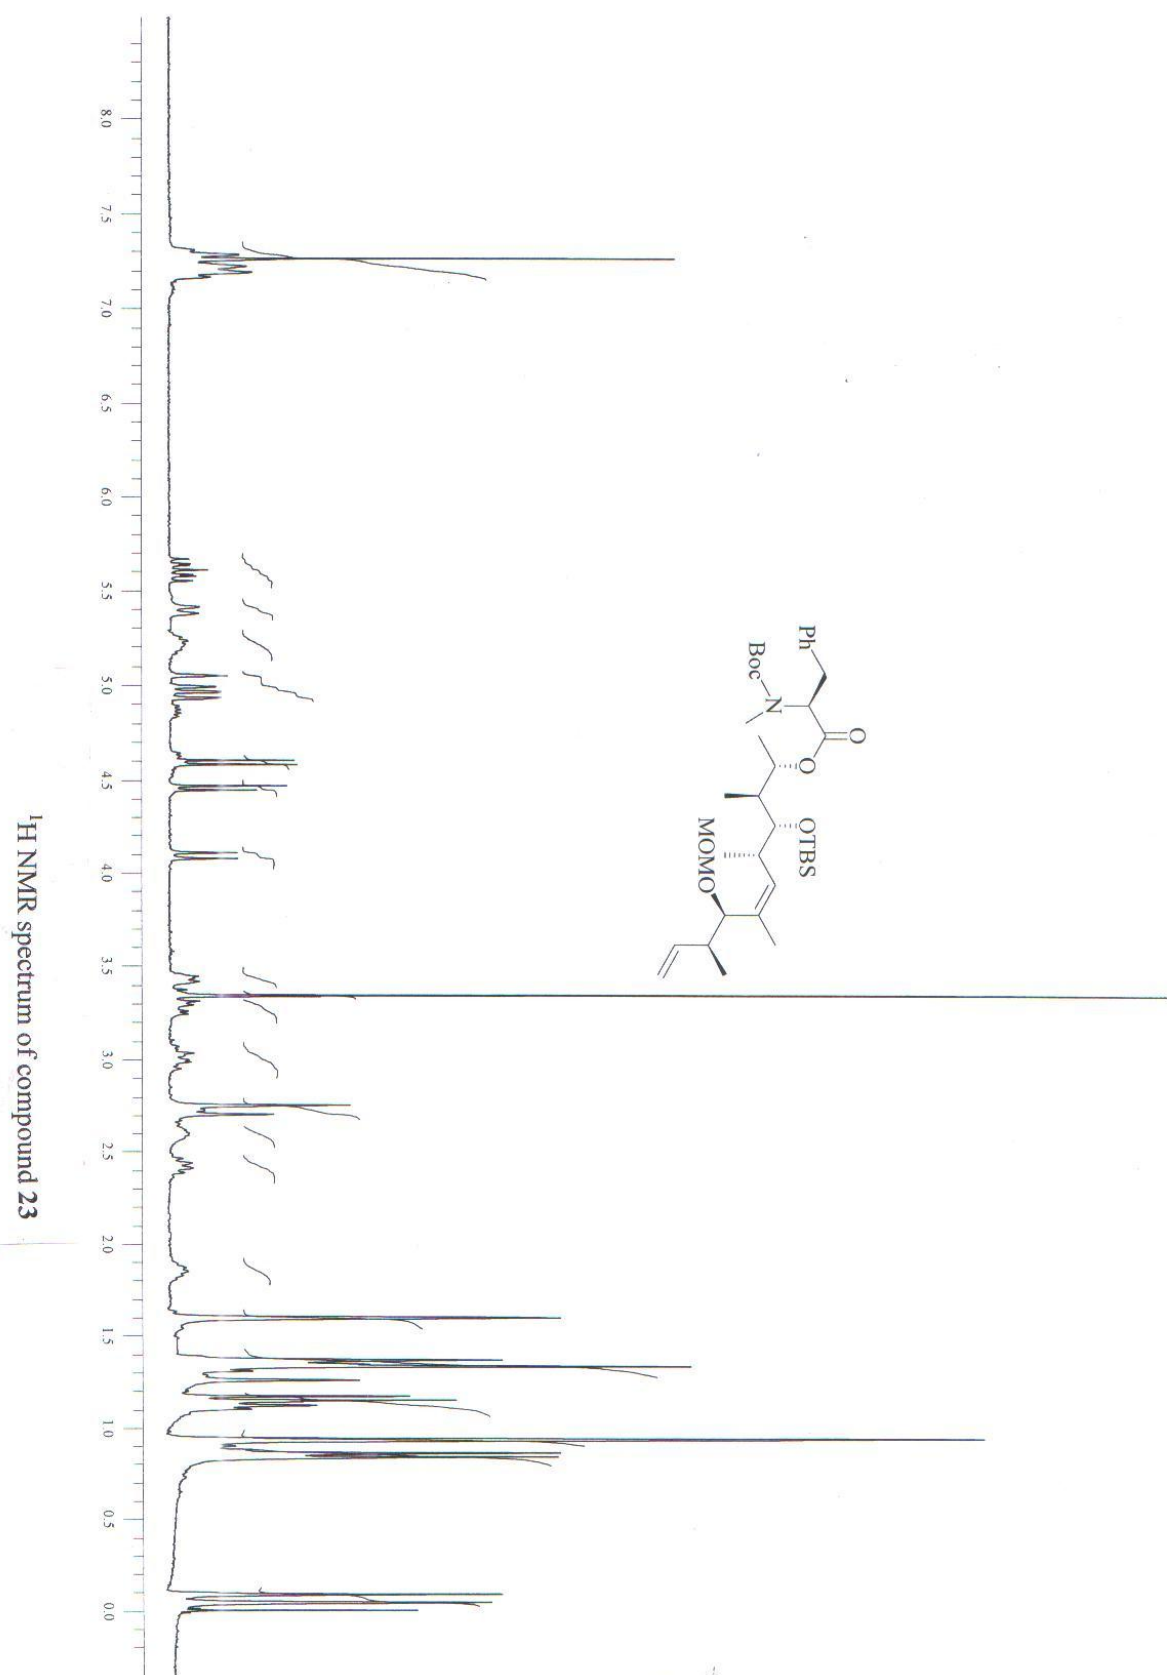

<sup>13</sup>C NMR spectrum of compound 23

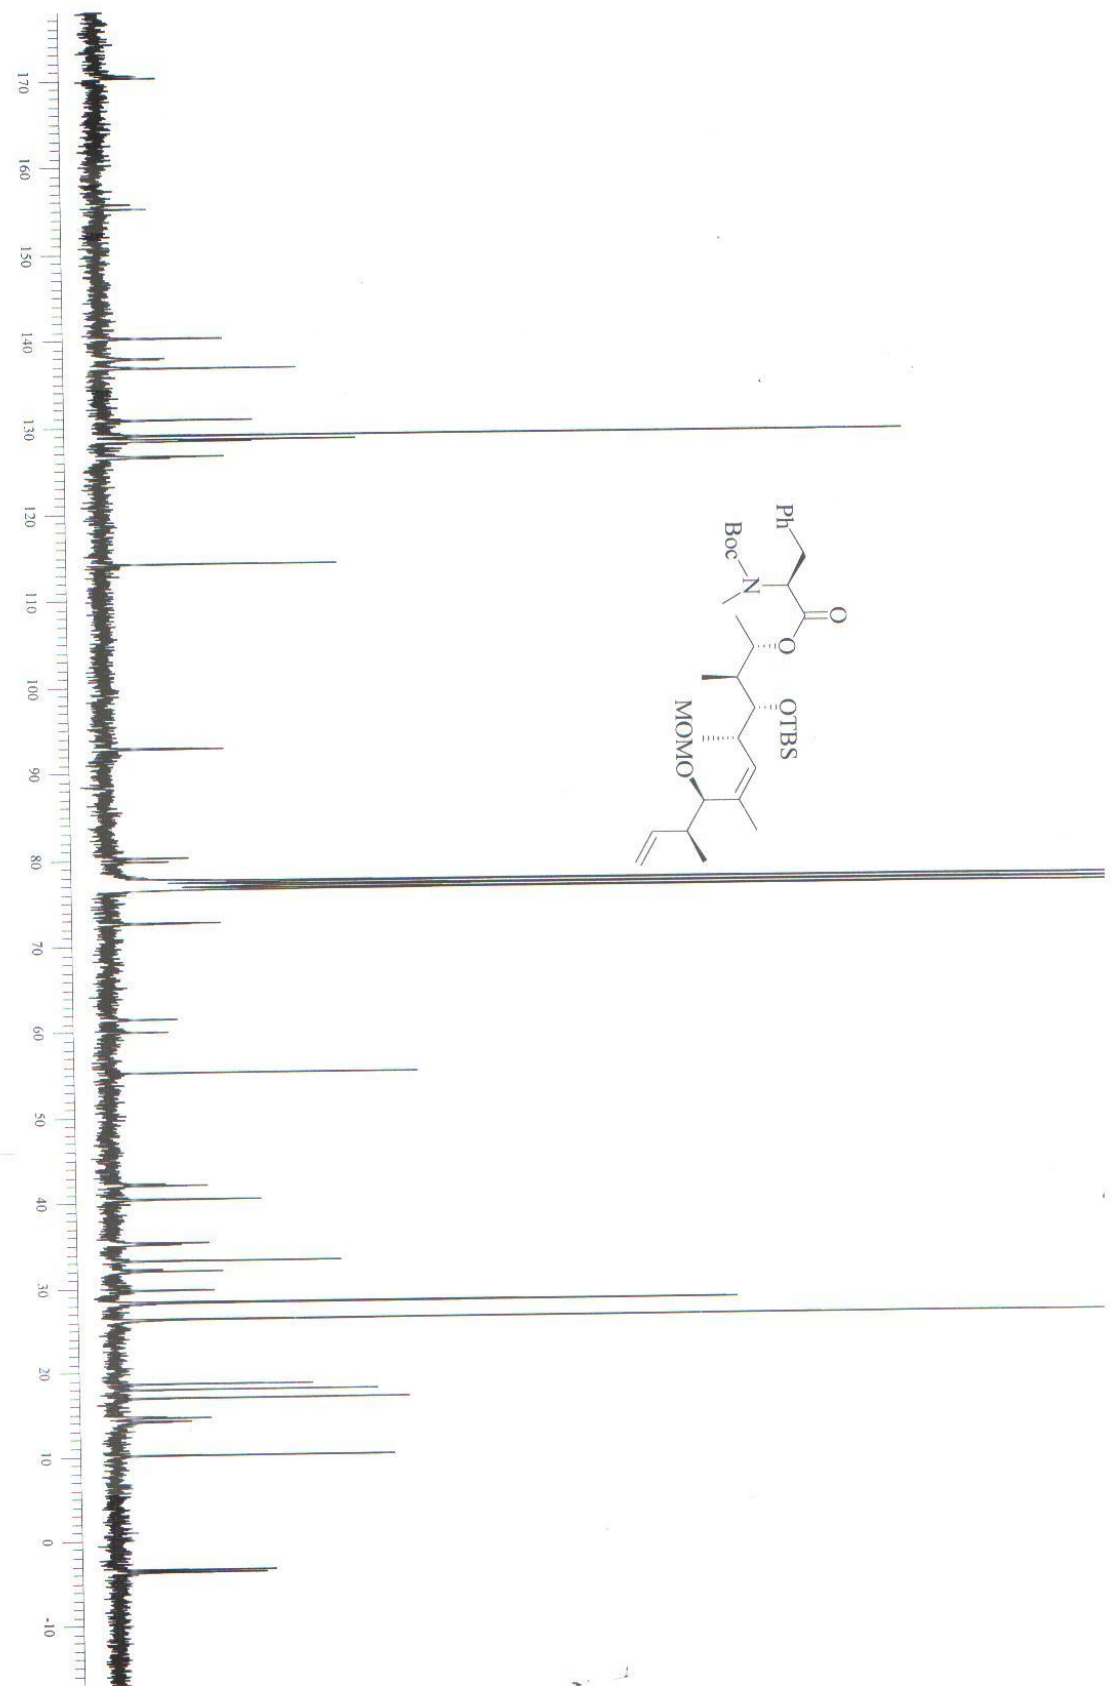

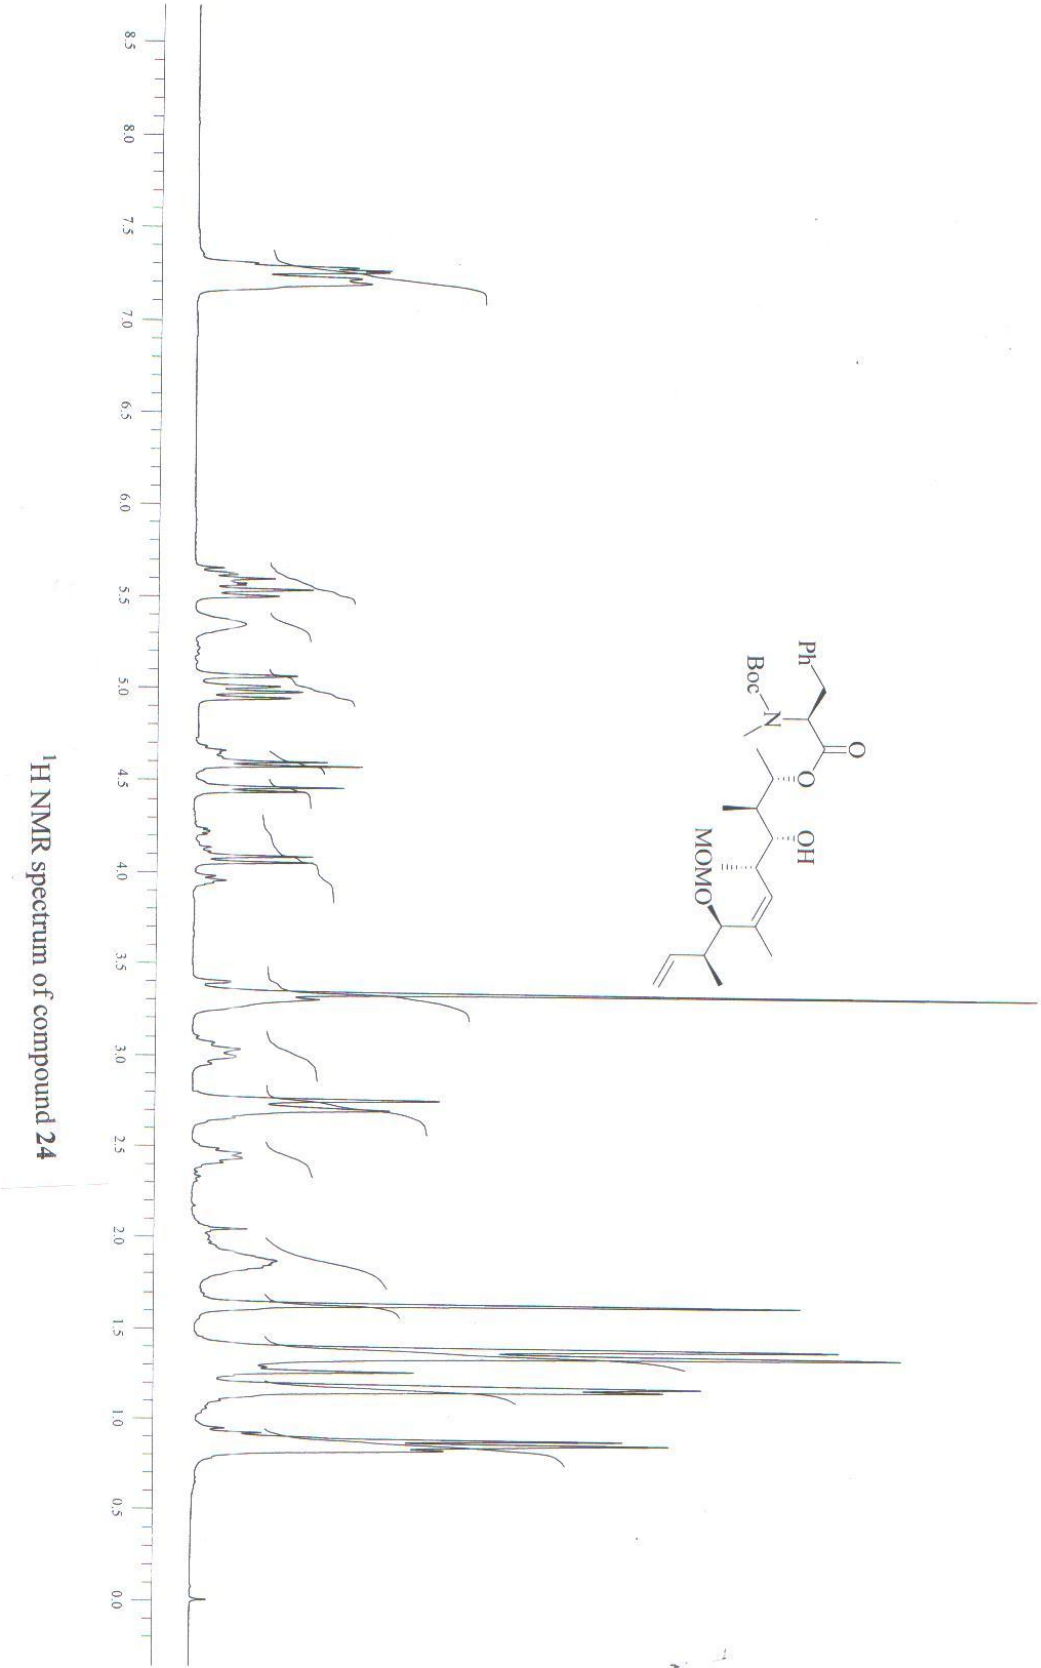

<sup>13</sup>C NMR spectrum of compound 24

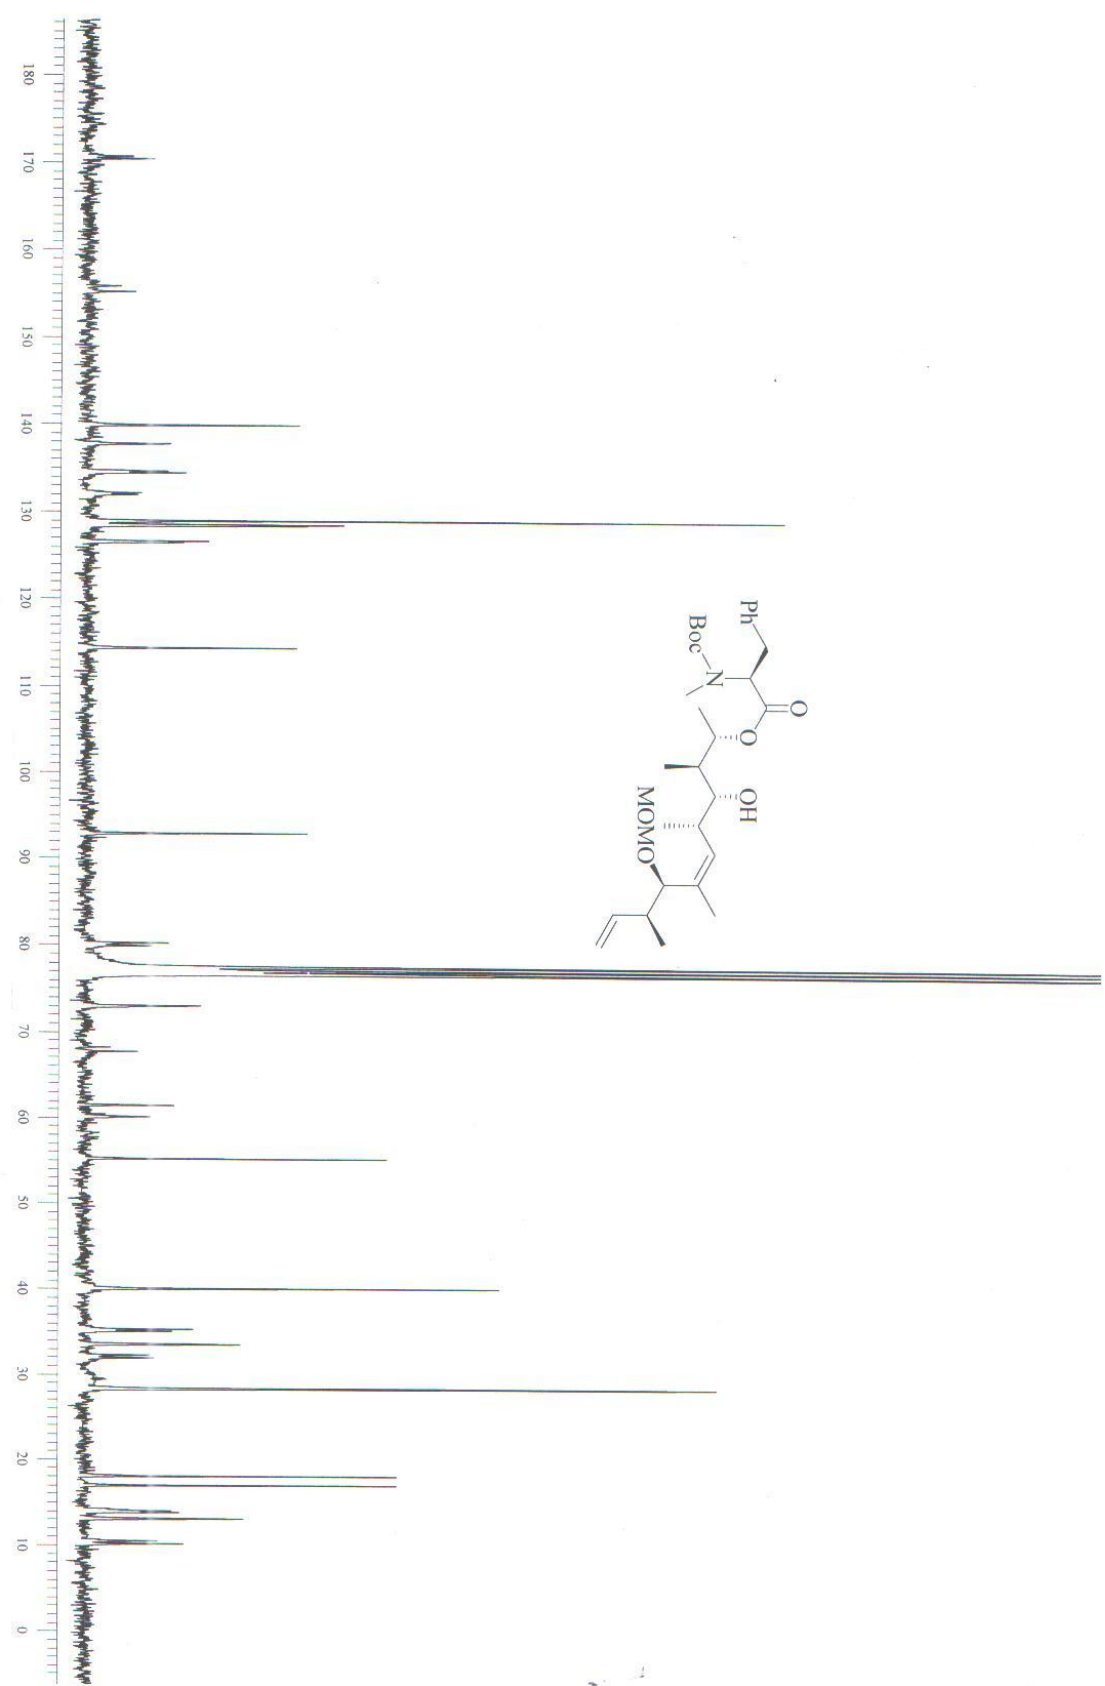

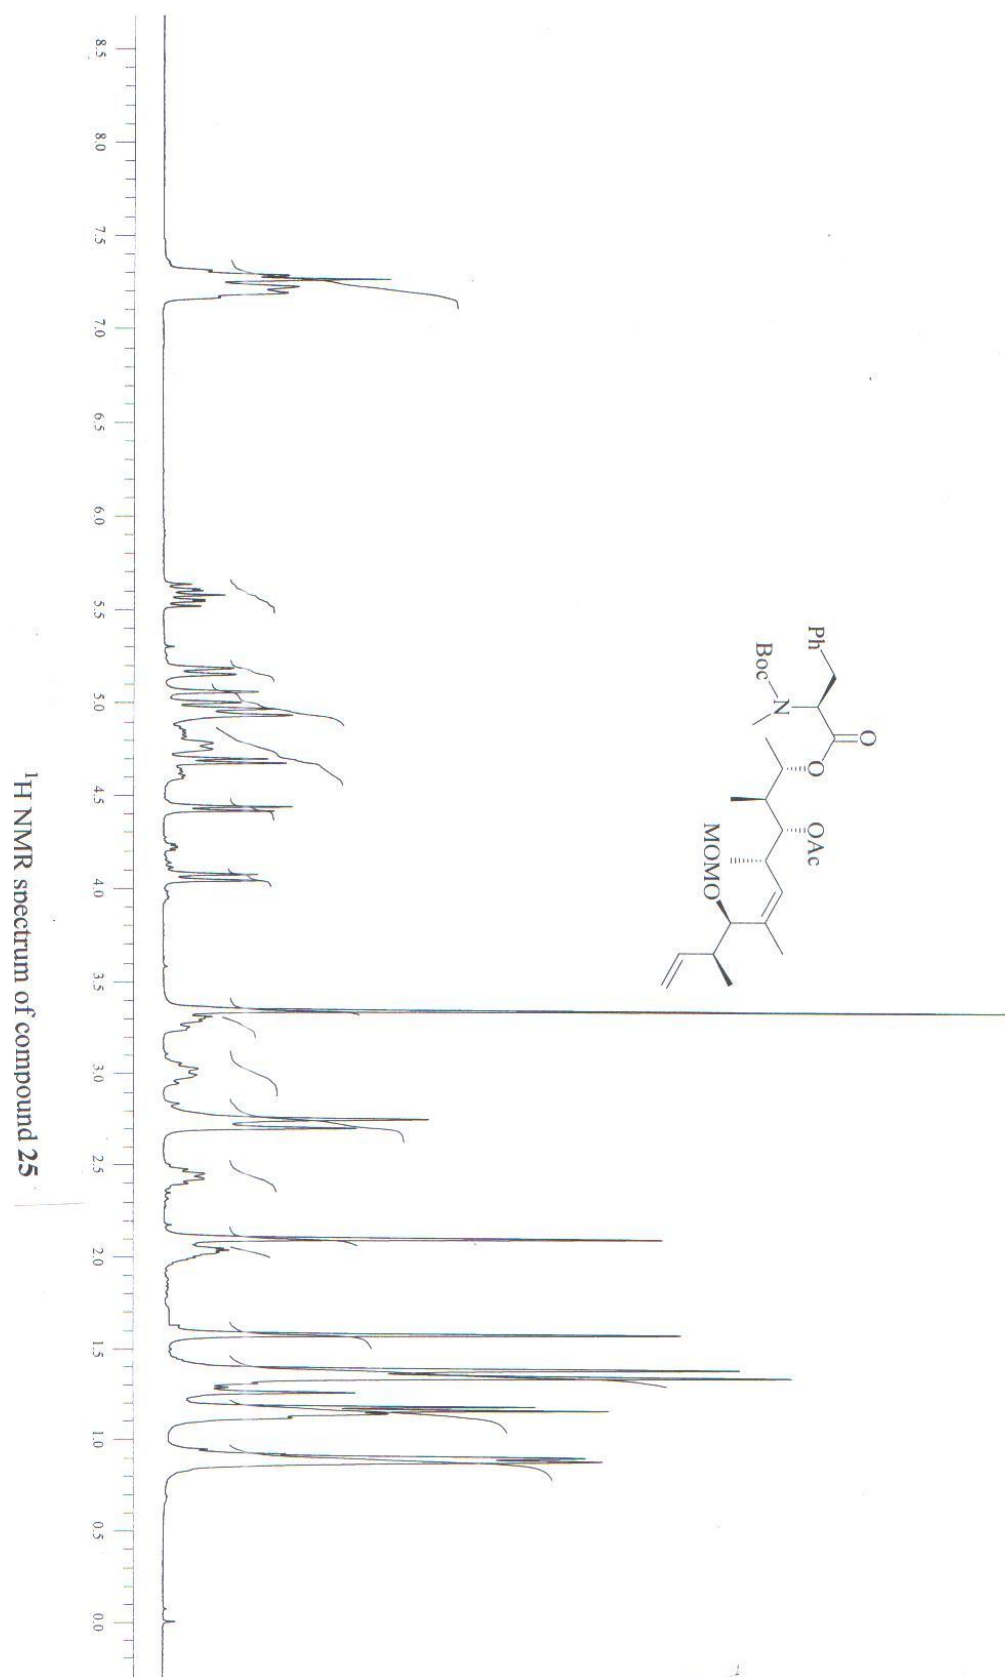



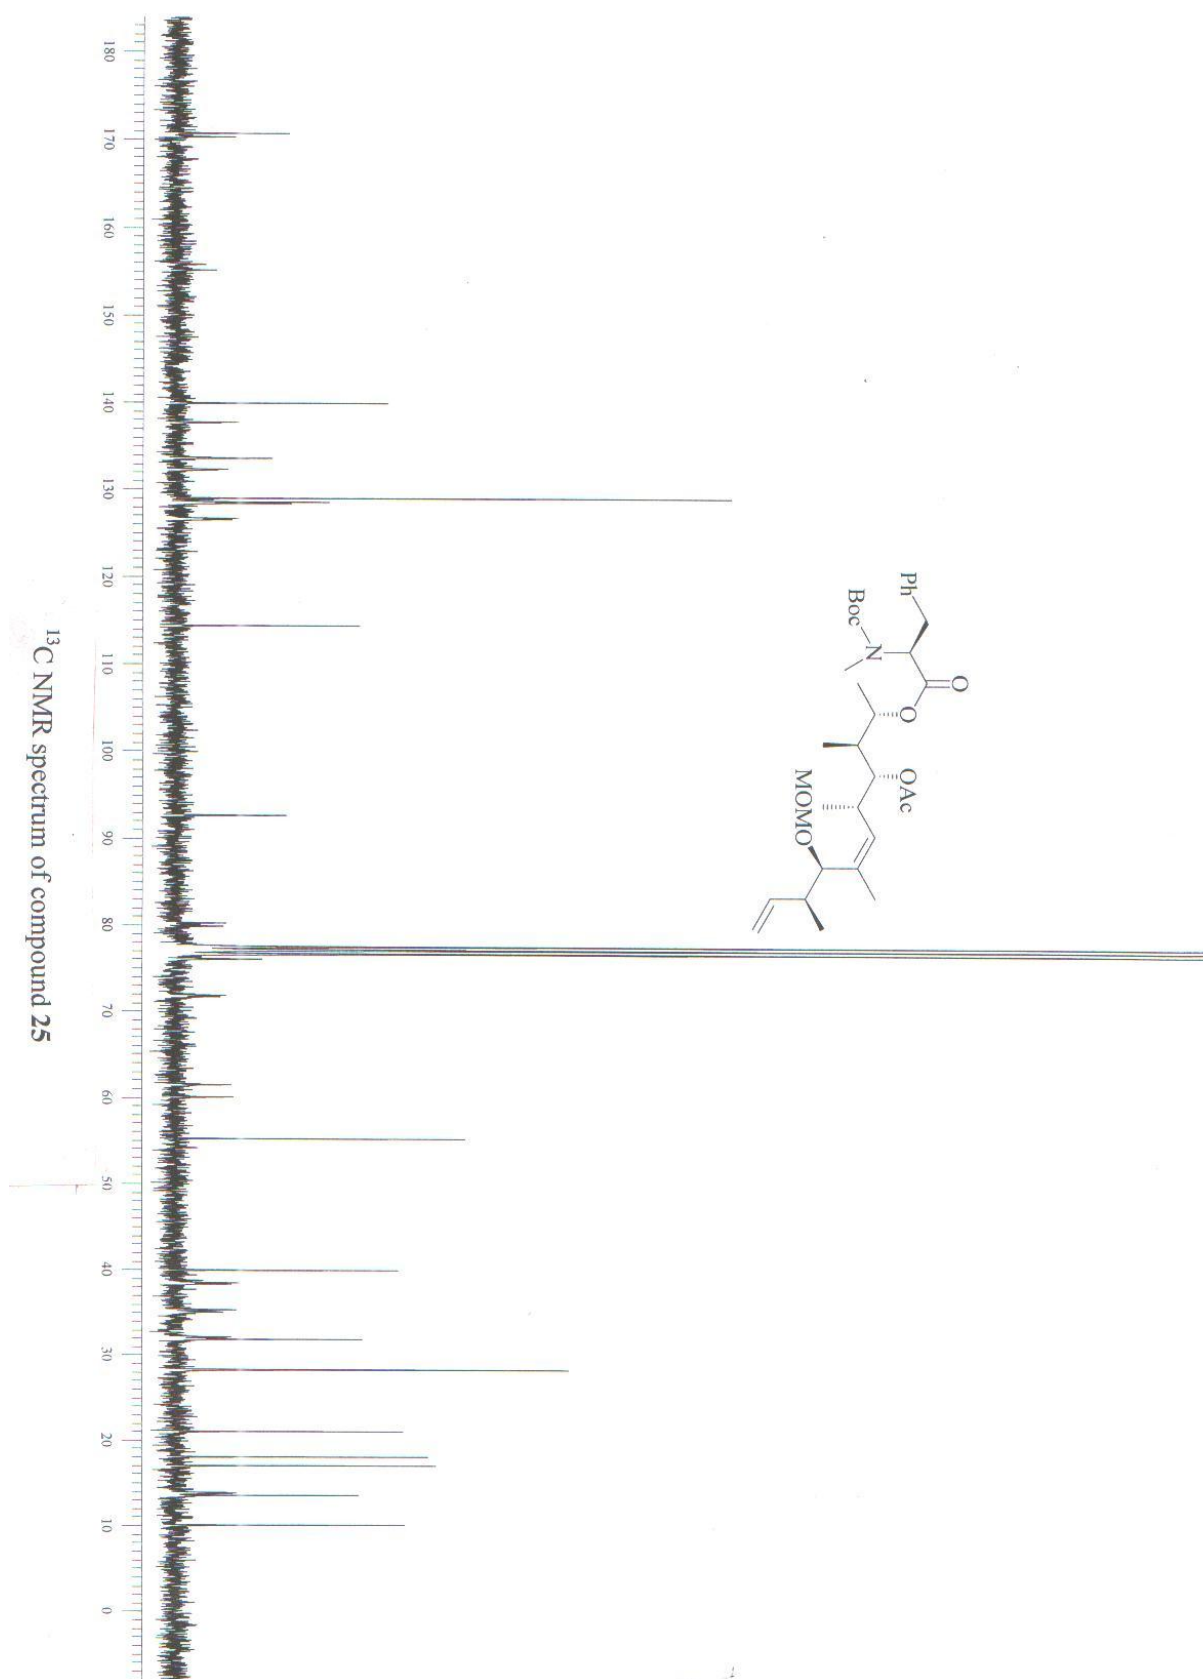

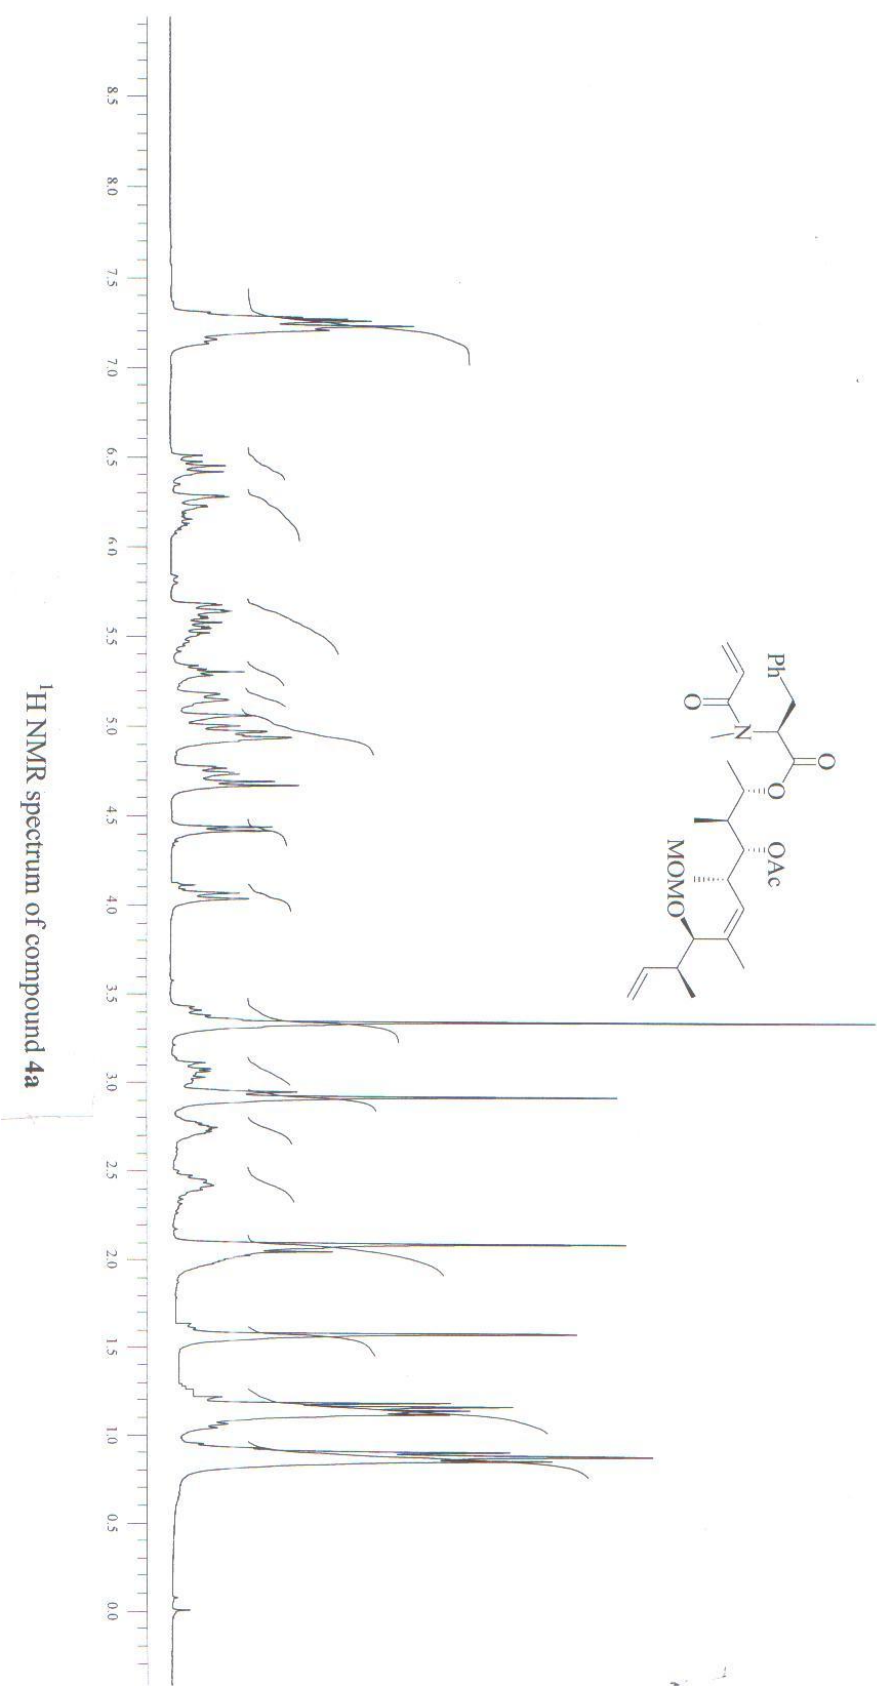

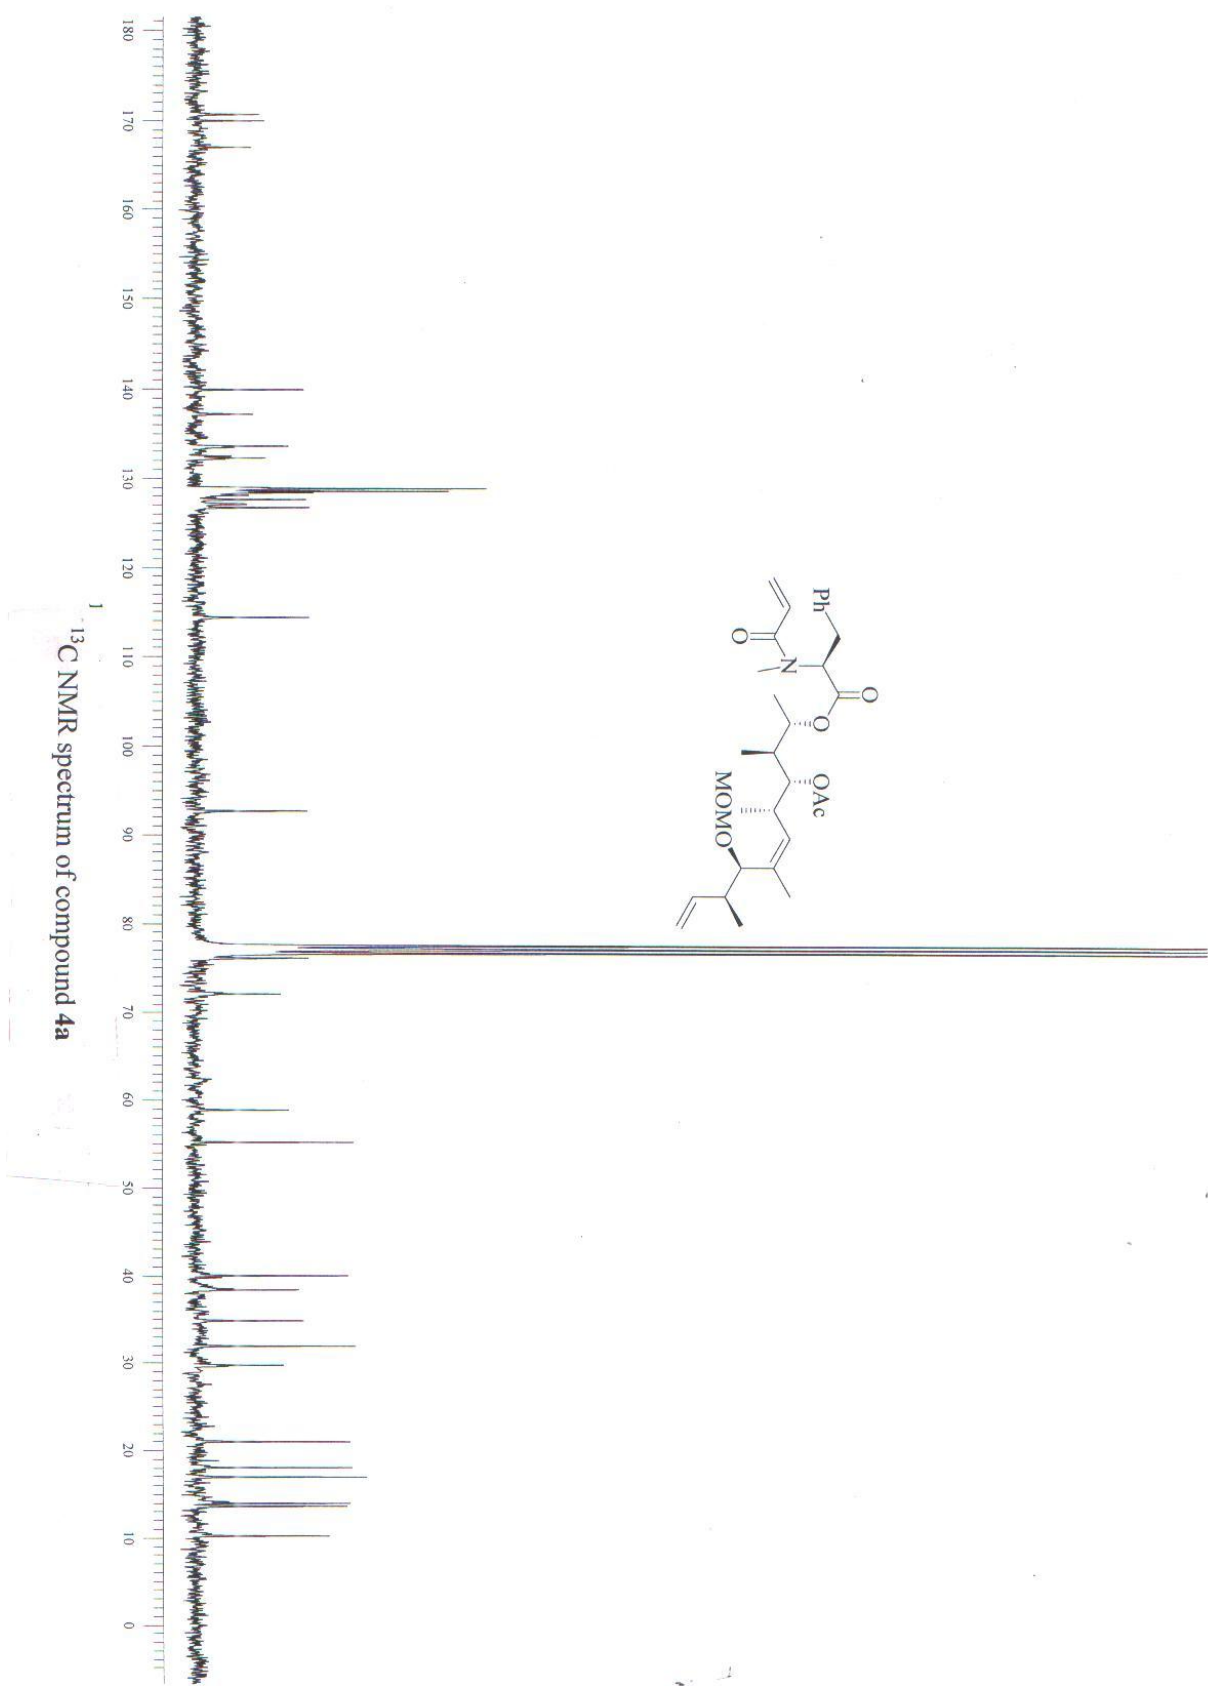

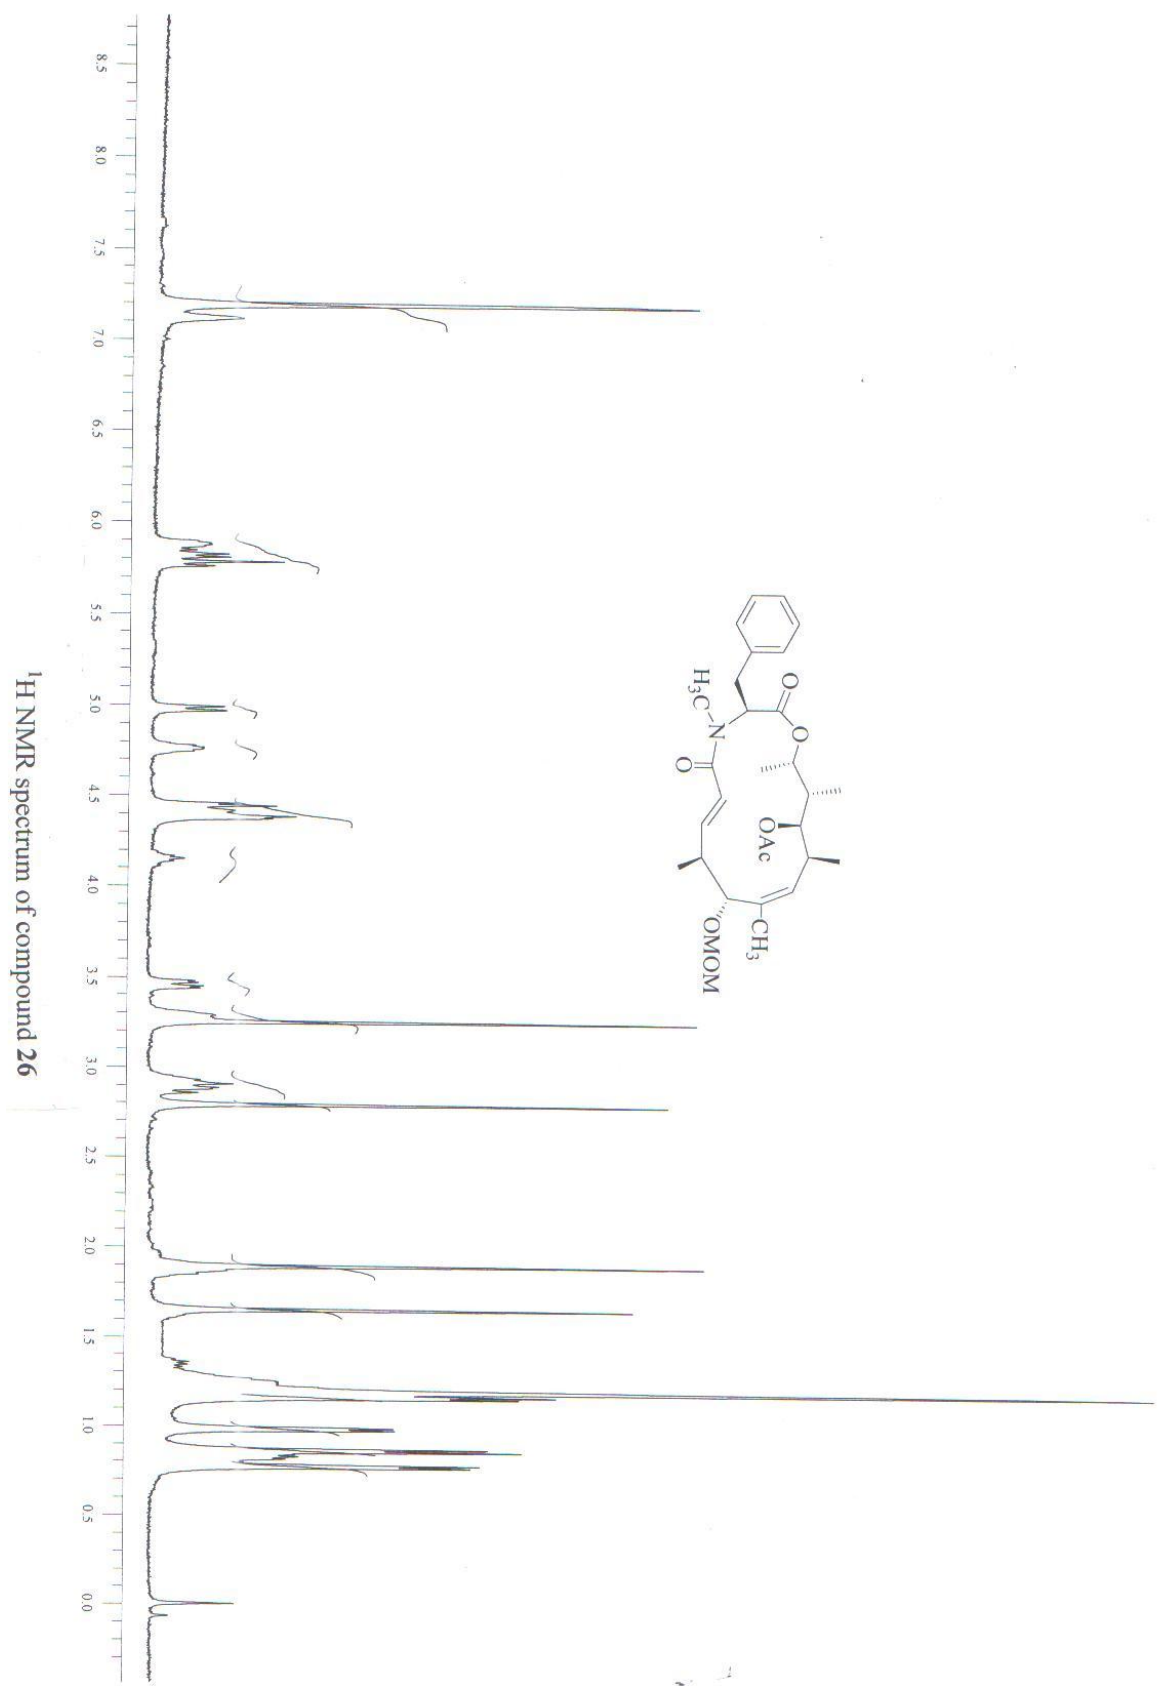

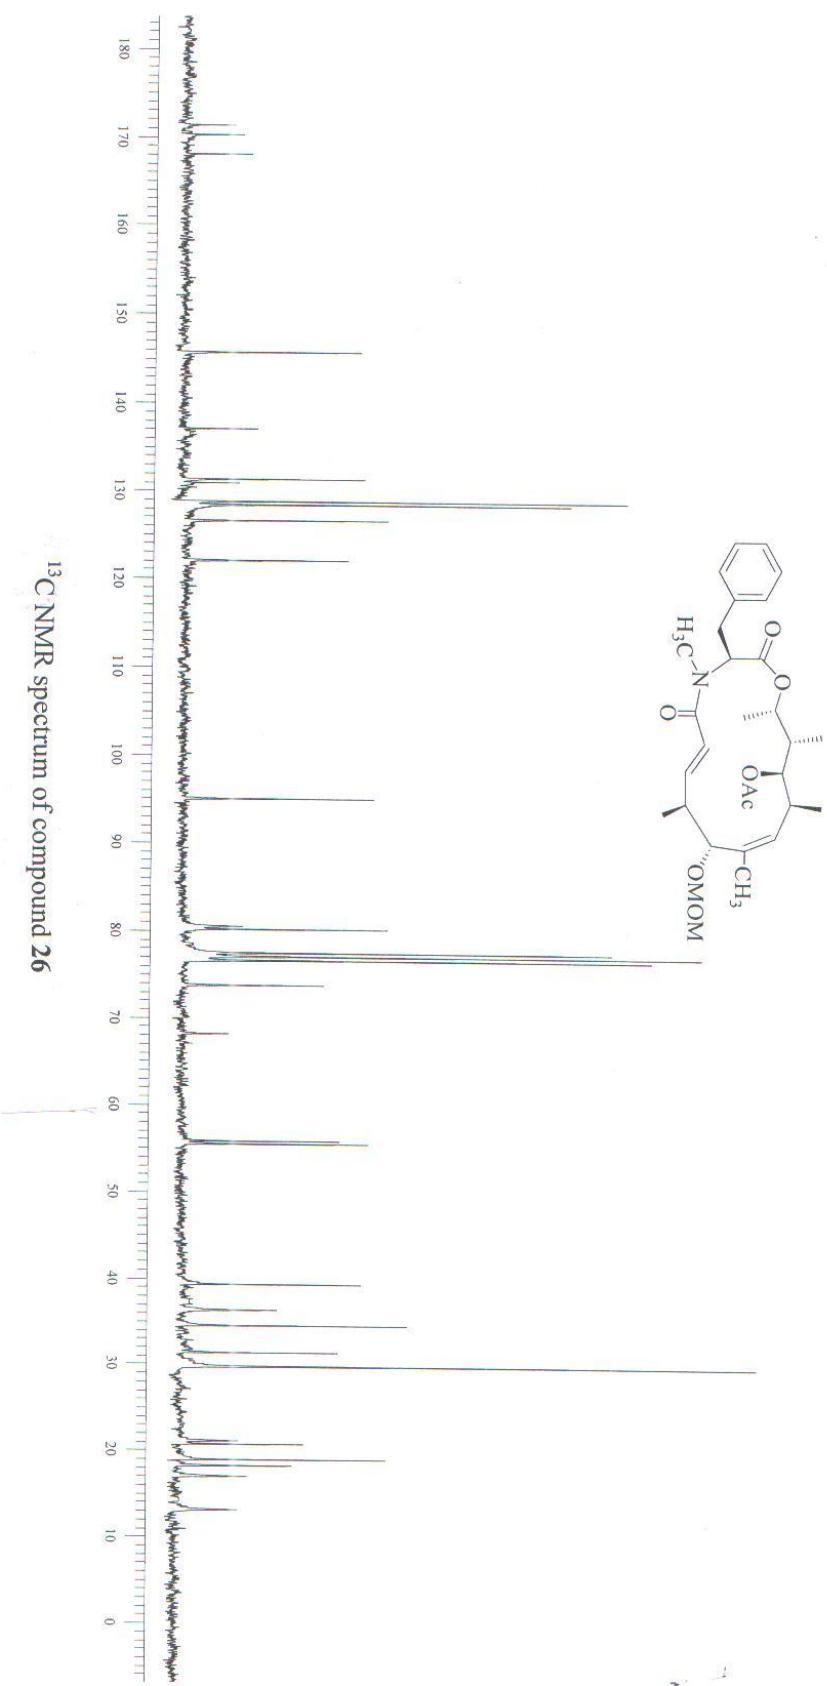

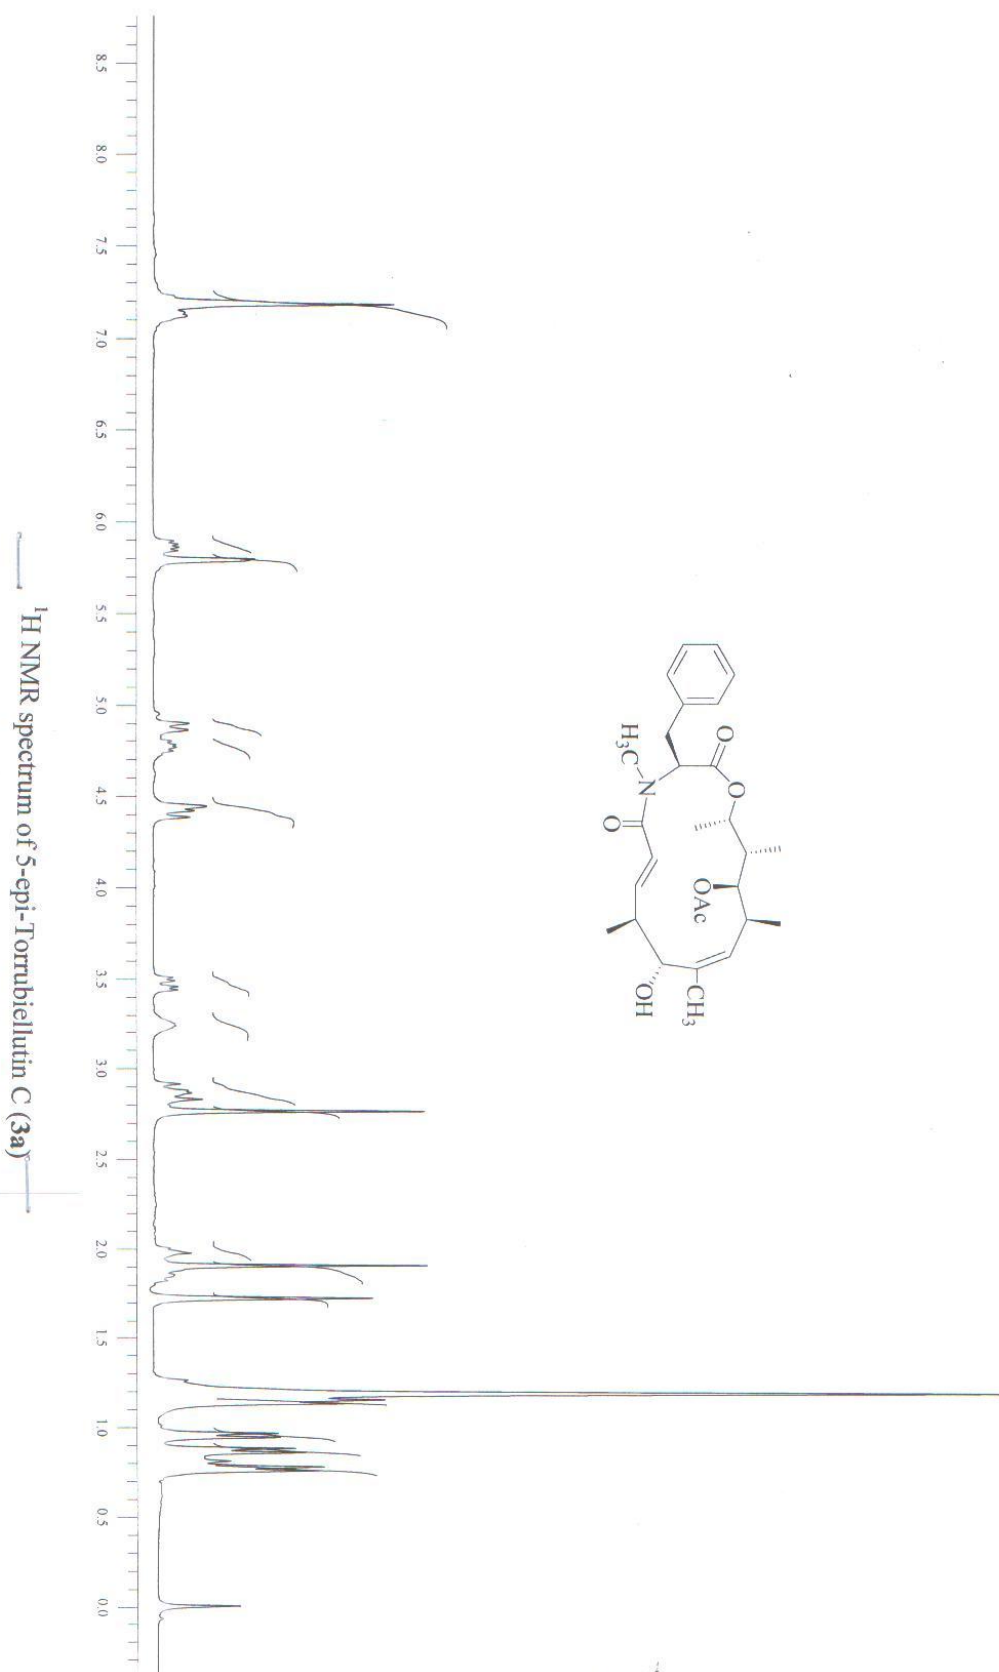

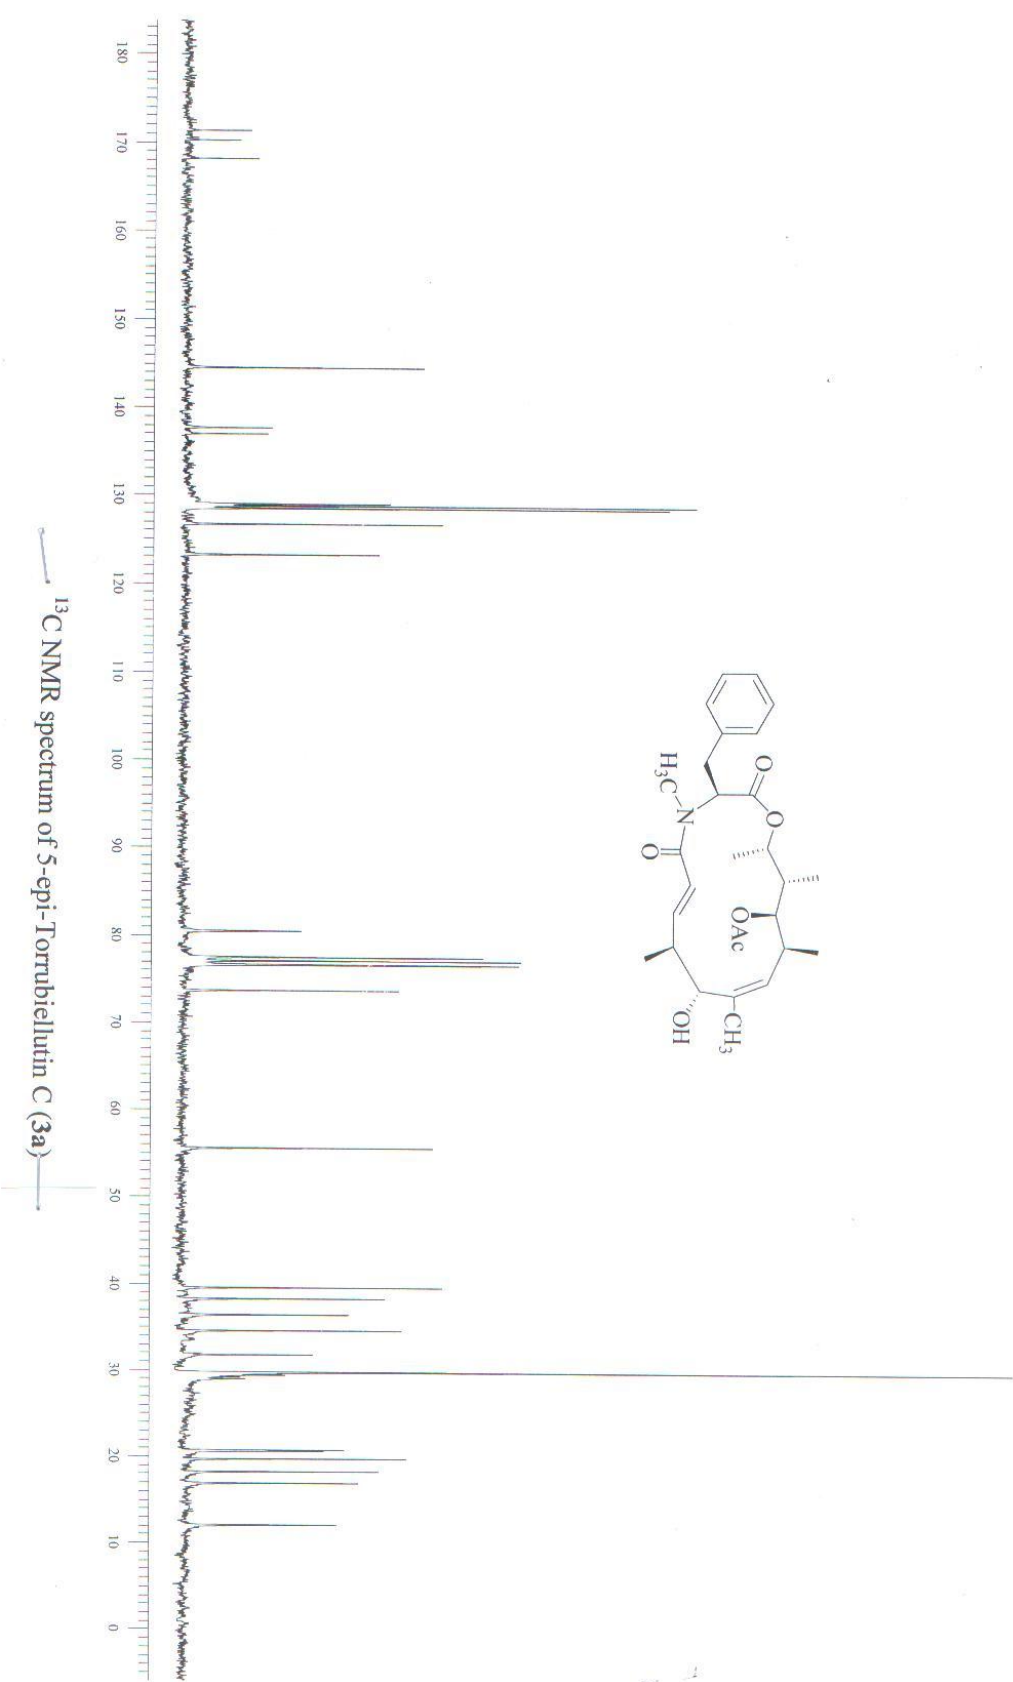

Data File C:  
Sample Name: **HPLC Spectrum of 5-*epi*-Torrubiellutin C (3a)**

```
=====
Acq. Operator   : B.RAMESH                      Seq. Line :   11
Acq. Instrument : Instrument 1                    Location  : Vial 65
Injection Date  : 10/12/2012 11:37:20 PM          Inj       :    1
                                              Inj Volume: 5 µl

Acq. Method     : C:\Chem32\1\METHODS\MOLBANK55P.M
Last changed    : 10/12/2012 11:35:53 PM by B.RAMESH
Analysis Method : C:\Chem32\1\METHODS\ONLYMASS.M
Last changed    : 6/19/2013 8:40:14 PM by B.RAMESH
Method Info     : COLUMN:WATERS SYMMETRY C-18:250X4.6MM,5U
                  MOBILEPHASE:75% MEQH IN WATER
                  FLOWRATE:1.0ML/MIN
                  DETECTION:210NM
=====
```

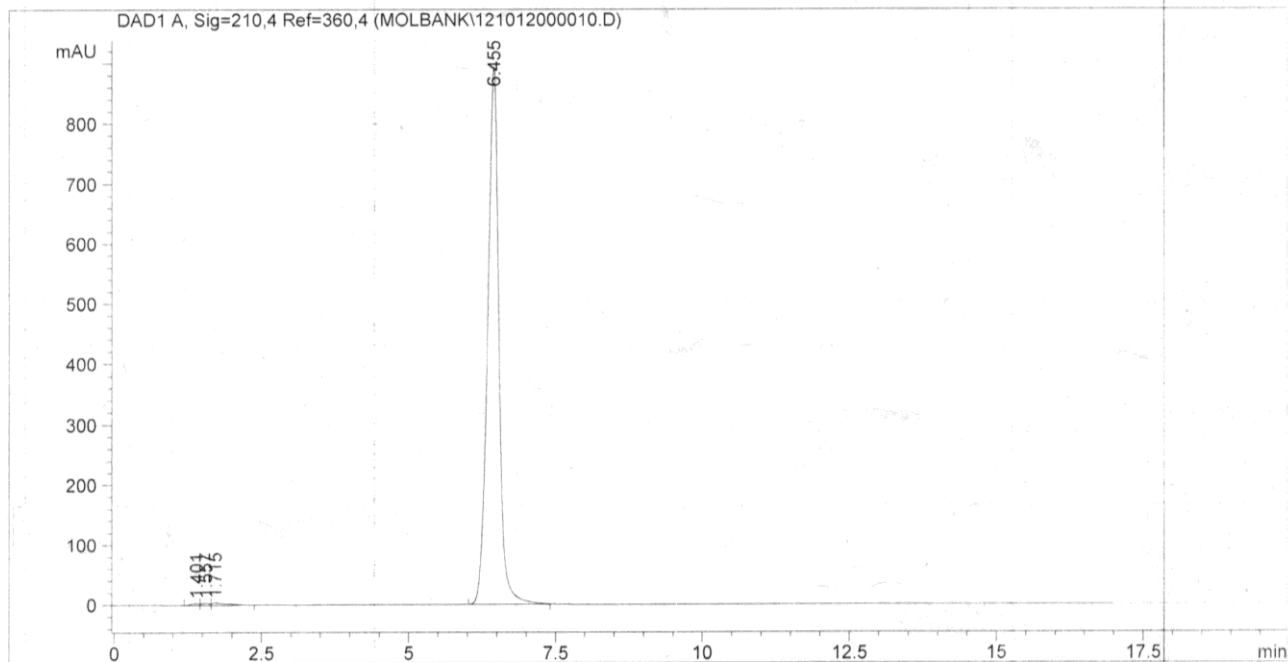

=====  
Area Percent Report  
=====

```
Sorted By      : Signal
Multiplier     : 1.0000
Dilution      : 1.0000
Use Multiplier & Dilution Factor with ISTDs
```

Signal 1: DAD1 A, Sig=210,4 Ref=360,4

| Peak # | RetTime [min] | Type | Width [min] | Area [mAU*s] | Height [mAU] | Area %  |
|--------|---------------|------|-------------|--------------|--------------|---------|
| 1      | 1.401         | BV   | 0.1206      | 27.33620     | 3.17002      | 0.2254  |
| 2      | 1.557         | VV   | 0.1293      | 33.73642     | 3.35558      | 0.2782  |
| 3      | 1.715         | VB   | 0.2164      | 67.18101     | 3.91038      | 0.5540  |
| 4      | 6.455         | BB   | 0.1987      | 1.19978e4    | 893.02563    | 98.9423 |

Totals : 1.21261e4 903.46162

=====
